# 1           **Convergent morphology and divergent phenology: unravelling the** 2                           **coexistence of mimetic *Morpho* butterfly species**

3  
4   **Authors:** Camille Le Roy<sup>1,2,\*</sup>, Camille Roux<sup>3</sup>, Elisabeth Authier<sup>1</sup>, Héloïse Bastide<sup>4</sup>, Vincent  
5                           Debat<sup>1</sup> and Violaine Llaurens<sup>1</sup>.

## 6   **Affiliations:**

7   <sup>1</sup>Institut de Systématique, Evolution, Biodiversité (ISYEB), Muséum National d'Histoire  
8   Naturelle, CNRS, Sorbonne Université, EPHE, Université des Antilles, CP50, 75005 Paris,  
9   France.

10   <sup>2</sup>Université Paris Descartes, Sorbonne Paris Cité, 12 rue de l'École de Médecine, 75006 Paris,  
11   France.

12   <sup>3</sup>Université Lille, CNRS, UMR 8198 - Evo-Eco-Paleo, F-59000 Lille, France.

13   <sup>4</sup>Laboratoire Evolution Génomes Comportement et Ecologie, CNRS, IRD, Université Paris-  
14   Sud, Université Paris-Saclay, Gif-sur-Yvette, France.

## 15 16   **Abstract**

17   The emergence and persistence of closely-related species in sympatry is puzzling because the  
18   potential gene flow and the common local selective pressures may lead to either merging or  
19   competitive exclusion. Some species of *Morpho* butterflies occurring in sympatry display  
20   highly similar wing colour patterns. Associated with erratic flight abilities, their bright  
21   colouration may limit predator success and discourage future attacks. The evolution of similar  
22   colouration in sympatric species is thus likely under local selection by predators (i.e. escape  
23   mimicry). Such phenotypic similarity may promote interspecific territoriality and/or  
24   reproductive interference, questioning how closely-related co-mimetic species become  
25   sexually isolated and coexist in sympatry. We performed a series of field experiments using  
26   flying *Morpho* dummies placed in a natural habitat where wild males commonly patrol.  
27   Analysing the interactions of wild *Morpho* with different dummies, we show that similarity in  
28   wing colour pattern leads to interspecific territoriality and courtship among sympatric species.  
29   Using genomic data, we then showed that sympatric *Morpho* species are surprisingly strictly  
30   isolated despite their close relatedness and the observed heterospecific interactions. Finally,  
31   using a mark-recapture experiment, we discovered a strong temporal segregation in patrolling  
32   activity of males from two co-mimetic sister species. Such divergence in phenology may  
33   favour sympatry between closely-related species, despite behavioural interferences induced  
34   by the local convergence in colour pattern. Altogether, our findings show that temporal  
35   segregation may facilitate the co-existence of closely-related species sharing the same

36 ecological niche, suggesting that phenological shifts may represent an overlooked factor of  
37 sympatric speciation. Our study therefore highlights how the evolution of multiple traits may  
38 favour species diversification in sympatry by partitioning niche in different dimensions.

39

40 **Keywords:** Reproductive interference; Territoriality; Mate recognition; Cryptic signalling;  
41 Escape mimicry.

42

### 43 **Introduction**

44 Natural communities are composed of multiple species involved in diverse ecological  
45 interactions either facilitating or impairing their co-existence. Shared ancestry induces  
46 ecological and morphological similarity of closely-related species, promoting their co-  
47 existence in similar niches (Wiens and Graham, 2005). However, such similarity also  
48 inherently limits this co-occurrence (Abrams, 1983; MacArthur and Levins, 1967) by  
49 increasing interspecific competition and/or reproductive interference (Brown and Wilson,  
50 1956; Grant and Grant, 2006; Gröning and Hochkirch, 2008; Kyogoku, 2015). Furthermore,  
51 gene flow is more likely to happen between closely-related species during secondary contacts  
52 (Hewitt, 2000), and may impair their genomic and phenotypic divergence (Bolnick and  
53 Fitzpatrick, 2007). The genomic and ecological similarity may thus limit co-existence of  
54 closely-related species in sympatry.

55 Some types of genetic exchanges and ecological interactions might nevertheless facilitate  
56 such co-existence. Gene flow between closely-related species can indeed enhance local  
57 adaptation through introgression, enabling the rapid emergence of locally adaptive traits in  
58 colonizing species (Dasmahapatra et al., 2012; Huerta-Sánchez et al., 2014; Vekemans, 2010).  
59 Commonly inherited traits may locally benefit to individuals of closely-related species: when  
60 facing common predators for example, responding to alarm cues emitted by heterospecifics  
61 (Chivers et al., 2002; Dalesman and Rundle, 2010), or sharing a common warning signal with  
62 co-occurring species (Müller, 1879; Sherratt and Beatty, 2003). Such interspecific positive  
63 dependence is predicted to favour species co-existence (Aubier, 2020).

64 Shared signals among species may however enhance interspecific behavioural interference  
65 (Grether et al., 2017), including heterospecific courtship and male-male competition (Gröning  
66 and Hochkirch, 2008). Close relatedness between species then often results in reinforcement  
67 mechanisms promoting either divergent evolution of other mating cues (Saetre et al., 1997;  
68 Smadja and Ganem, 2008) or cryptic signalling (Dasmahapatra et al., 2012; Fordyce et al.,  
69 2002). Alternatively, shared signal among species may induce interspecific territoriality

70 (Drury et al., 2020; Grether et al., 2017; Souriau et al., 2018), thereby reducing resource  
71 competition and facilitating coexistence in segregating spatial niches within the geographic  
72 areas (e.g. Souriau et al., 2018; Tobias and Seddon, 2009). This spatial segregation might be  
73 especially promoted in recently diverged species where heterospecific competition and mating  
74 are high (Drury et al., 2020; Drury et al., 2015). Phylogenetic relatedness and phenotypic  
75 resemblance are indeed strong predictors of interspecific territoriality (Losin et al., 2016).  
76 Ecological factors preventing character divergence might therefore also promote interspecific  
77 territoriality (Drury et al., 2020).

78 Selection promoting traits convergence is particularly strong in mimetic butterflies,  
79 therefore limiting population divergence in sympatry. Convergence in warning pattern indeed  
80 frequently involves convergence in other traits like flight height (Elias et al., 2008) or host-  
81 plant (Willmott and Mallet, 2004), because sharing a common microhabitat induces a higher  
82 similarity of predator communities encountered and therefore an enhanced protection  
83 (Gompert et al., 2011). Nevertheless, the benefits conferred by overlapping visual signals and  
84 ecological niches in mimetic species may in turn incur fitness cost through increased  
85 heterospecific rivalry, courtship and the expression of Dobzhansky-Müller incompatibilities  
86 in hybrids (Estrada and Jiggins, 2008; Mérot et al., 2015; Welch, 2004), ultimately limiting  
87 the co-existence of closely-related mimetic species in sympatry (Aubier et al., 2017). The  
88 conflicting ecological interactions between mimetic species therefore question their  
89 persistence in sympatry when they are closely-related.

90 Here we investigate how territoriality and cryptic signalling might favour the coexistence  
91 of closely-related mimetic species by focusing on sympatric *Morpho* butterfly species,  
92 displaying striking large blue iridescent wings (Debat et al., 2018). Although not chemically  
93 defended, these butterflies are very difficult to capture because of their fast, erratic flight. The  
94 contrast between their dorsal bright blue and ventral cryptic brownish wing surfaces induces a  
95 flash pattern during flapping flight, that was suggested to confuse predators, further increasing  
96 their difficulty of capture (Debat et al., 2018; Murali, 2018; Pinheiro and Campos, 2019;  
97 Young, 1971). Predators may then learn to avoid such elusive prey harbouring the  
98 conspicuous blue patterns. Some sympatric *Morpho* species were shown to locally converge  
99 in their blue pattern, probably because of frequency-dependent selection generated by  
100 predator behaviour, in a similar way as Müllerian mimics (Llaurens *et al.* 2020). The  
101 iridescent blue colouration of *Morpho* butterflies shared by sympatric species may thus reduce  
102 individual predation by advertising escape ability (the "escape mimicry" hypothesis, see Páez  
103 et al., 2020). Such local convergence might in turn impair species recognition and mate

104 choice. This duality questions how closely-related co-mimetic species become sexually  
105 isolated and may coexist in sympatry.

106

## 107 **Results and Discussion**

108 We focused on a single locality where three mimetic species from the genus *Morpho* (*M.*  
109 *achilles*, *M. helenor* and *M. deidamia*) live in sympatry. In this field site, males from these  
110 three closely-related species display their typical patrolling behaviour along the river bed,  
111 allowing investigating species interactions in sympatry, as well as genomic exchanges among  
112 sympatric species.

113

### 114 **Closely-related *Morpho* species with mimetic colouration live in sympatry**

115 We performed a series of experiments at this field site, located in the Amazonian Peru, at the  
116 foothill of the Andes. We first estimate the local abundances of the different *Morpho* species  
117 at the study site using a mark-recapture experiment (see material and methods and Fig. S1).  
118 *Morpho achilles* was the most abundant species (mean  $\pm$  se = 264  $\pm$  68), followed by *M.*  
119 *helenor* (mean  $\pm$  se = 195  $\pm$  49). Individuals from *M. deidamia* were too rarely caught to  
120 allow estimating population size, suggesting a lower abundance at this site (Table S1). These  
121 three mimetic species thus co-occur at the study site, allowing relevant experiments on  
122 species co-existence.

123

### 124 **Heterospecific interactions lead to reproductive interference among sympatric species**

125 To test whether similarity in colour pattern among these sympatric *Morpho* species leads to  
126 heterospecific rivalry and courtship, we then investigated the response of patrolling males to  
127 butterfly dummies placed in the field. We built realistic dummies using the actual wings of  
128 captured *Morpho*, set up on a solar-powered fluttering device reproducing butterfly flying  
129 behaviour (Fig. 1; Movie S1; see also Fig. S2, S3). To ensure that only visual cues were  
130 triggering the interactions, the wings were washed in hexane prior mounting, ruling out any  
131 effect of pheromones (Darragh et al., 2017). We built 10 different dummies with the wings of  
132 specimens from different species and sexes, all caught in the same Peruvian site. We used  
133 both sexes of the two mimetic sister-species *M. helenor* and *M. achilles*, as well as of a third  
134 mimetic species *M. deidamia*, that all present an iridescent blue band bordered by proximal  
135 and distal black areas, and the phenotypically distinct *M. menelaus*, exhibiting fully blue  
136 iridescent wings (local dummies:  $n = 8$ ) (Fig. 2, S2). The last two dummies were built from  
137 the wings of males *M. helenor* and *M. achilles* captured in French Guiana (exotic dummies:

138  $n = 2$ ), exhibiting a narrower blue band relative to local – Peruvian – individuals (Fig. 2, S2).  
139 We tested all dummies ( $n=10$ ) following a randomized design: a different dummy was placed  
140 each morning at the same site and left fluttering on the river bank for 5 hours. This was  
141 replicated 4 times per dummy.

142 Over a two months period, we recorded 2,700 patrols of wild males and studied  
143 behavioural responses to dummies. We specifically focused on the behaviour of butterflies  
144 from the two mimetic sister species *M. helenor* and *M. achilles*, which represented the large  
145 majority of the passing males (35% and 47% respectively Fig. S4). During these sessions, we  
146 scored two behaviours : (1) *approaches*, when a marked change in the trajectory of the  
147 passing butterfly towards the dummy was observed and (2) *interactions*, when the butterfly  
148 entered a  $1\text{m}^3$  zone around the dummy (Fig. 1). This procedure allowed us to test whether  
149 patrolling *Morpho* males (1) are more strongly attracted by the colour pattern of their  
150 conspecifics as compared to that of other species, (2) discriminate between sexes and (3) are  
151 more attracted by local colour patterns than by exotic ones.

152

### 153 *Long-range visual attraction to blue butterflies*

154 About half of the patrolling individuals deviated from their flight path to *approach* the setup  
155 (see Fig. S5, S6 and Table S2,S3 for more details). The differences in wing area and  
156 proportion of iridescent blue on the wing among the dummies had a limited effect on the  
157 percentage of *approach* (Fig. S7 and Table S4). The long range blue signals emitted by the  
158 different wing patterns displayed in the different species tested thus appeared similarly  
159 attractive for patrolling males of the sympatric species *M. helenor* and *M. achilles*, suggesting  
160 they may approach to anything roughly recognized as a potential mate or rival.

161

### 162 *Significant discrimination between local and exotic butterflies*

163 In both *M. helenor* and *M. achilles*, about 40% of the *approaches* resulted in an *interaction*,  
164 the visitor typically flying in circles around the dummy, with little evidence of discrimination  
165 between sympatric conspecifics and congeners, as well as between female and male dummies  
166 (Fig. 2). No effect of sex or identity of the dummy was detected on the duration of the  
167 *interactions* (Kruskal-Wallis test, dummy sex: Chi-square = 3.71,  $P = 0.20$ ,  $df = 1$ ; dummy  
168 identity: Chi-square = 14.03,  $P = 0.12$ ,  $df = 9$ ). However, *interactions* occurred in markedly  
169 lower proportions with the exotic dummies as compared to most local dummies (Fig. 2).  
170 Males *Morpho* do discriminate between slightly different colour patterns (*i.e.* large blue band  
171 in local individuals, vs. narrower blue band in exotic ones), but yet they largely engage in

172 *interactions* with congeners bearing locally known signals, including signals sharply  
173 dissimilar from their own (e.g. fully blue wings in *M. menelaus*). Overall, dummies with  
174 larger wing area and greater proportion of iridescent blue colouration were more likely to  
175 trigger *interaction* (Fig. S7), suggesting that these characteristics are used by patrolling males  
176 to discriminate among dummies. Such a stronger response to local, known phenotypes  
177 (including heterospecifics) than to exotic ones (including conspecifics), has been suggested to  
178 reflect high interspecific territoriality, particularly in males (e.g. Tobias and Seddon, 2009).  
179 Consistent with this hypothesis, *interactions* were the most indiscriminate among male local  
180 dummies, as compared to female dummies (Fig. 2).

181

### 182 *Recognition of conspecific females in Morpho achilles*

183 While no significant differences were observed in *interactions* with dummies displaying male  
184 wings of *M. achilles* and *M. helenor*, patrolling *M. achilles* males clearly avoided its co-  
185 mimetic *M. helenor* female, but interacted indiscriminately with the dummies of the other  
186 sympatric species (i.e. *M. deidamia* and *M. menelaus*) (Fig. 2). Such a specific, acute visual  
187 discrimination towards its phenotypically closest sister species suggest that mate-recognition  
188 based on cryptic signals could have evolved in *M. achilles*, possibly as a result of  
189 reinforcement selecting against hybridization (Servedio and Noor, 2003). Reinforcement  
190 process may also occur through divergence in olfactory cues enabling discrimination among  
191 species (Mérot et al., 2015; Smadja and Ganem, 2008), although this remains to be  
192 investigated in *Morpho*.

193 To test whether the behaviour of *M. achilles* males differs when interacting with  
194 conspecific male and female dummies, we then equipped our set-up with a stereoscopic high-  
195 speed videography system, enabling to quantify the three-dimensional flight kinematics of  
196 visiting butterflies in natural conditions on a sub-set of sessions (Fig. 1). Striking behavioural  
197 differences were observed between the interactions toward males and females ( $n = 14$  flights  
198 analysed for each sex): on average, wild males circled closer to the female than to the male  
199 dummy (regression of proportion of time spent vs. distance from dummy female:  $P < 0.001$ ;  
200  $R^2 = 0.07$ , dummy male:  $P = 0.09$ ;  $R = 0.01$ ; Fig. 3). Besides, males approached the female  
201 dummy following a smoothly decelerating flight path, ensuring a steady speed when close to  
202 the female, whereas they showed more erratic accelerations around the male dummy  
203 (regression of acceleration on distance from dummy female:  $P < 0.001$ ;  $R^2 = 0.14$ , dummy  
204 male:  $P = 0.07$ ;  $R^2 = 0.02$ ; Fig. 3). During these aerial *interactions*, *M. achilles* males adjust

205 their flight behaviour according to the sex of their conspecific, relying solely on colour pattern  
206 visual cues.

207

208 *High reproductive interferences and marked differences in discrimination behaviour between*  
209 *closely-related species*

210 Altogether, our results thus clearly suggest that heterospecific contests frequently occur  
211 among males from sympatric *Morpho* species, and that heterospecific mating or mating  
212 attempts can frequently occur, leading to strong reproductive interferences in those sympatric  
213 species. Males from the species *M. helenor* were found to approach dummies significantly  
214 more than *M. achilles* (mean % of approach in *M. helenor* =  $48.3 \pm 15.7$ ; *M. achilles* =  $39.7 \pm$   
215  $14.8$ ;  $P = 0.01$ ). They did not showed increased *interactions* with conspecific females as  
216 compared to *M. achilles* females (Fig. 2). Behavioural interferences between these sympatric  
217 species are thus large, with a higher indiscriminate behaviour in *M. helenor* than in *M.*  
218 *achilles*. These interspecific interactions would then induce high costs to both sexes:  
219 indiscriminate aerial contest performed with all passing individuals are energetically costly to  
220 males (Kemp, 2013; Takeuchi, 2017), while females are likely harassed by such  
221 indiscriminate mating attempts (Gröning and Hochkirch, 2008; Kyogoku, 2015; Kyogoku and  
222 Nishida, 2013). These costs could be higher in *M. helenor* where discrimination capacities  
223 were found lower than in *M. achilles*. Indiscriminate mate-searching behaviour in *M. helenor*  
224 moreover likely increases competition for females among males from sympatric species. This  
225 is expected to promote interspecific territoriality (Drury et al., 2020; Grether et al., 2017), in  
226 agreement with the frequent heterospecific contests observed between males *M. helenor* and  
227 *M. achilles*. These costly behaviours question the stable coexistence and the reproductive  
228 isolation of sympatric *Morpho* species.

229

230 **Limited genetic exchanges between species despite close relatedness and reproductive**  
231 **interference.**

232 We then sampled DNA from 31 butterflies caught at this site (13 *M. achilles*, 8 *M. deidamia*  
233 and 10 *M. helenor*), to explore the level of genomic exchanges among species. To specifically  
234 test whether the genomic patterns of polymorphism (Fig. S8, S9) and divergence (Fig. S10)  
235 reflect episodes of introgression between species, we performed RAD-sequencing and  
236 statistically evaluate alternative scenarios of speciation (Fig. S11), with and without gene flow  
237 using the demographic inferences with linked selection (DILS) approach (Fraisie et al., 2020).  
238 By comparing in a hierarchical approach eight categories of models according to their

239 temporal patterns of migration between *M. helenor*, *M. achilles* and *M. deidamia*, this  
240 Approximate Bayesian Computation approach provides strong statistical support for an  
241 isolation of *M. deidamia* with both *M. helenor* and *M. achilles* (Fig. 4; posterior probability =  
242 0.91). The best scenario among those proposed also describes a divergence between *M.*  
243 *helenor* and *M. achilles* with migration restricted to the first generations after the split  
244 (posterior probability = 0.82). This analysis suggests that current putative hybridizations  
245 would not represent a significant source of intraspecific genetic diversity (Fig. 4; Table S5).  
246 Consistent with the phylogeny (Chazot et al., 2016), demographic inferences performed on  
247 our Peruvian populations revealed more recent time of split between the sister species *M.*  
248 *achilles* and *M. helenor* ( $T_2 = 1.11$  million generations) than between these two species and  
249 *M. deidamia* ( $T_1 = 4.13$  million generations). This strict isolation despite close relatedness and  
250 reproductive interference between *M. achilles* and *M. helenor* questions the ecological factors  
251 limiting hybridization in sympatry.

252

### 253 **Temporal segregation between sympatric sister-species**

254 By analysing the temporal variations in the mark-recapture experiments, we observed a  
255 striking difference in patrolling time among species (Kruskal-Wallis test: Chi-square = 179.7,  
256  $P < 0.001$ ,  $df = 3$ ), with little overlap between the sister species *M. achilles* and *M. helenor*  
257 (Fig. 5). Males *M. helenor* patrolled earlier than *M. achilles* (mean patrolling time  $\pm$  s.d. =  
258  $11:14 \pm 00:45$  vs.  $12:35 \pm 00:40$ , respectively). Patrolling time in *M. deidamia* ( $12:40 \pm$   
259  $00:46$ ) however fully overlaps that of *M. achilles*. Time of capture was remarkably similar  
260 among recaptures of a same individual in the species *M. achilles* (correlation between time of  
261 first vs. second capture:  $r = 0.40$ ;  $P = 0.05$ ), suggesting a regularity in patrolling time at the  
262 individual level in this species (Fig. 5). Whether such individual temporal regularity is  
263 genetically determined or reflects a plastic behaviour (Groot, 2014; Schöfl et al., 2009)  
264 remains to be investigated. The close phenotypic similarity of sympatric *Morpho* species,  
265 probably promoted by escape mimicry (Llaurens et al. 2020) might thus enhance reproductive  
266 interferences between then closely-related species *M. helenor* and *M. achilles* and may have  
267 favoured the evolution of divergent temporal niches. Reproductive and/or aggressive  
268 interference are generally expected to promote spatial or temporal habitat segregation between  
269 species because it reduces the cost of negative interspecific interactions (Grether et al., 2017;  
270 Robinson and Terborgh, 1995).

271 Altogether, our results suggest that a strong interspecific competition occurs among males  
272 from mimetic *Morpho* species in sympatry, but that this competition is likely mitigated by



273 their temporal segregation. Heterospecific courtships may also be limited, if the temporal  
274 segregation observed in *Morpho* males is mirrored by a similar temporal partitioning of  
275 females activities. The activity of females butterflies is often challenging to estimate because  
276 of their highly cryptic behaviour (Devries et al., 2008), and was not measured in our study, as  
277 they were too rarely encountered. Synchronization of mating activity between sexes is  
278 however likely (Hirota et al., 2001; Iwasa and Obara, 1989), because any deviation of males  
279 relative to females activity would reduce the probability of intra-specific mating (Groot, 2014;  
280 Schöfl et al., 2009). In contrast, a shift in mating timing among species can act as a powerful  
281 isolation mechanism (Taylor and Friesen, 2017), and might explain how co-mimetic *Morpho*  
282 species can coexist in a same habitat while remaining sexually isolated.

283 Temporal segregation in butterfly mating activities may be a widespread process enabling  
284 the persistence of diversity-rich assemblages, as suggested by several reports of temporally  
285 structured sexual activities in other butterflies (Callaghan, 1982; Freitas et al., 1997; Kemp  
286 and Rutowski, 2001), including closely-related species (Devries et al., 2008). Our study on  
287 mimetic butterflies highlights that the co-existence of closely-related species can generate  
288 complex ecological interactions, both mutualistic (mimicry) and antagonistic (reproductive  
289 interference), that could be mitigated by shifts in temporal niches. Our study therefore  
290 highlights how the evolution of multiple traits may favour species diversification in sympatry  
291 by partitioning niche in different dimensions.

292

## 293 **Material and Methods**

### 294 ***Study site and population***

295 The study was conducted between July and October 2019 in the North of Peru. We focused on  
296 populations of coexisting *Morpho* species present in the regional park of the Cordillera  
297 Escalera (San Martin Department) near the city of Tarapoto. Both the capture-recapture and  
298 the dummy experiment were performed at the exact same location, on the bank of the  
299 Shilcayo river (06°27'14.364" S, 76°20'45.852" W).

300

### 301 ***DNA extraction and RAD-Sequencing***

302 We used 31 wild males caught on this sites to perform population genomics analyses (*M.*  
303 *achilles* -  $n = 13$ , *M. helenor* -  $n = 10$  and *M. deidamia*-  $n = 8$ ). DNA was then extracted from  
304 each sample using a slice of the thorax, using Qiagen kit DNeasy Blood & Tissue. DNA  
305 quantification (using Qubit and Nanodrop methods) and DNA quality (by electrophoresis)  
306 was performed before the sequencing carried out in the MGX-Montpellier GenomiX platform

307 (Montpellier, France). DNA digestion was performed using the Pst1 enzyme and paired-end  
308 RAD-sequencing has then been performed in one run as set out by Baird and Etter (2008)  
309 (2008), giving 299 billion reads, comprising R1 and R2 reads for each sequenced fragment.  
310 The sequencing has been performed on Illumina sequencers HiSeq2500 so that reads (125bp)  
311 were expected to be of high quality, without missing base (N content). MGX then  
312 demultiplexed the data using the software Stacks (Catchen et al., 2013; Catchen et al., 2011),  
313 allowing assigning each read to his sample ID. Adapters have all been correctly removed from  
314 each reads.

315

### 316 ***Reads quality, alignment and data set generation***

317 Reads quality has been performed using FastQC v0.11.9 software  
318 (<http://www.bioinformatics.babraham.ac.uk/projects/fastqc/>). All reads have the same length:  
319 119bp and 125bp for R1 and R2 paired-end reads respectively. Per base sequence quality were  
320 high for R1 paired-end sequences (>36) and for R2 paired-end sequences (>32) with a quality  
321 score per sequence around 39 for each reads (40 being the maximum). Sequence content per  
322 base was accurate for both R1 and R2 paired-end reads. GC content per was slightly higher  
323 than the theoretical distribution (calculated with the mean GC rate) for each reads. Thus, the  
324 high quality of reads allows avoiding read trimming or deletion.

325 One read alignment was realized using the Stacks V2.5 software  
326 (<http://catchenlab.life.illinois.edu/stacks/>). Parameters have been set using r80 methods which  
327 maximize the number of SNPs or loci shared by at least 80% of the samples (Paris et al.,  
328 2017). The optimized parameters are “max distance between stacks” (inside each sample) and  
329 “number of mismatches between stacks” (between samples). Every other parameters have  
330 been kept to default values. Data sets were in the form of VCF data file (containing all the  
331 SNPs found in the alignment) and fasta data file (which contain the two alleles found for  
332 every loci for each sample). A RAD -sequencing locus is thus a sequence composed of 1 to 3  
333 paired-end reads aligned together and delimited by restriction sites.

334 To run DILS-ABC inferences, Stacks fasta file has been converted in another fasta file  
335 compatible with DILS ([https://github.com/CoBiG2/RAD\\_Tools](https://github.com/CoBiG2/RAD_Tools)).

336

### 337 ***Demographic inferences***

338 Eight categories of demographic models were compared, according to temporal patterns of  
339 introgression. This was done to answer two questions on gene flow in *Morpho*: 1) is there  
340 ongoing migration between *M. helenor* and *M. achilles*? 2) do *M. helenor* and/or *M. achilles*

341 exchange alleles with *M. deidamia*? This was achieved by an ABC approach using a version  
342 of *DILS* adapted to samples of three populations/species (Fraisse et al., 2020).

343 A generalist model was studied (Fig. S11). This model describes an ancestral population  
344 subdivided in two populations: the ancestor of *M. deidamia* and the common ancestor of *M.*  
345 *helenor*/*M. achilles*. The latter population was further subdivided into the three  
346 species/populations currently sampled. Each split event is accompanied by a change in  
347 demographic size, the value of which is independent of the ancestral size. In addition, given  
348 clear genomic signatures for recent demographic changes with largely negative Tajima's *D*,  
349 we implemented variations for the effective sizes of the 3 modern lineages at independent  
350 times. Finally, migration can occur between each pair of species/populations. Migration  
351 affecting the *M. helenor*/*M. achilles* pair can either be the result of secondary contact after a  
352 period of isolation (ongoing migration), or of ancestral migration (current isolation) as in  
353 (Roux et al., 2016).

354 As this model is over-parameterized, our general strategy is to investigate the above two  
355 questions by comparing variations of this generalist model. Thus, to test the gene flow  
356 between *M. helenor* and *M. achilles*, we compare two categories of models. 1) With random  
357 parameter values for all model parameters including the ongoing migration between *M.*  
358 *helenor* and *M. achilles* (gene flow resulting from a secondary contact between them); 2) as  
359 above, but with the migration between *M. helenor* and *M. achilles* set to zero after a randomly  
360 drawn number of generations following their split.

361 For each models, 50,000 of simulations using random combinations of parameters were  
362 performed. Parameters were drawn from uniform prior distributions. Population sizes were  
363 sampled from the uniform prior [0-1,000,000] (in diploid individuals); the older time of split  
364 was sampled from the uniform prior [0-8,000,000] (generations); ages of the subsequent  
365 demographic events were sampled in a uniform prior between 0 and the sampled time of split.  
366 Migration rates  $4.N.m$  were sampled from the uniform prior [0-50]. Both migration rates and  
367 effective population sizes are allowed to vary throughout genomes as a result of link selection  
368 following (Charlesworth et al., 1993; Cruickshank and Hahn, 2014; Roux et al., 2014).

369 On each simulated data set we calculate a vector of means and standard deviations for  
370 different summary statistics: intraspecific statistics ( $\pi$  for *M. helenor*,  $\pi$  for *M. achilles*,  $\pi$  for  
371 *M. deidamia*,  $\theta_w$  for *M. helenor*,  $\theta_w$  for *M. achilles*,  $\theta_w$  for *M. deidamia*, Tajima's *D* for *M.*  
372 *helenor*, Tajima's *D* for *M. achilles*, Tajima's *D* for *M. deidamia*) and interspecific statistics  
373 (gross divergence, net divergence and  $F_{ST}$  for all three possible pairs; ABBA-BABA *D*).

374 Statistical comparisons between simulated and observed statistics were performed using  
375 the R package *abcrf* (Pudlo et al., 2014; Raynal et al., 2019).

376

### 377 ***Mark-recapture experiment***

378 To estimate abundance and patrolling activity among *Morpho* species, we performed capture-  
379 mark-recapture between 9 a.m. and 2 p.m. (flight activity in *Morpho* is drastically reduced in  
380 the afternoons at this site) during 17 sunny days. Although on few days, capture was aborted  
381 because of bad weather annihilating butterfly activity, the 17 capture sessions were mostly  
382 consecutives, as they were performed in a 22 days period. All butterflies were captured with  
383 hand-nets, identified at the species level, and numbered on their dorsal wing surface using a  
384 black marker. The exact time of each capture was annotated. Butterflies captured while  
385 inactive, such as those laying on a branch or on the ground were excluded from the analysis to  
386 focus exclusively on actively patrolling individuals. We measured patrolling time for a total  
387 of 295 occasions, including 78 recaptures (i.e. 217 individuals were captured at least once).  
388 All captured individuals were males. Individuals *M. achilles* were the most frequently  
389 captured ( $n = 121$ ), followed by *M. helenor* ( $n = 95$ ). Individuals *M. deidamia* were about half  
390 less captured ( $n = 48$ ), and individual *M. menelaus* were the least captured ( $n = 34$ ). Based on  
391 capture-recapture histories, we estimated individual abundance for each species using a  
392 loglinear model implemented in the R package *Rcapture* (Baillargeon and Rivest, 2007) (Fig.  
393 S1). Given the short duration the sampling period (22 days) relative to the longevity of adult  
394 *Morpho* butterflies (several months, Garcia et al., 2014), we used a closed-population model  
395 assuming no effect of births, deaths, immigration and emigration. Abundance was estimated  
396 in *Morpho helenor* and *M. achilles* only, as capture and re-capture events were too few in the  
397 other species (*M. deidamia* and *M. menelaus*) to allow estimating population size (Table. S1).  
398 Because striking differences in patrolling time were rapidly observed among *Morpho* species,  
399 we used time of the day as a predictor of species identity in order to distinguish between *M.*  
400 *helenor* and *M. achilles* in the below-described experiment because butterflies from these two  
401 species are morphologically too similar to be identified while flying (Fig. S12). After the 17  
402 nearly-consecutive days of capture, one day of capture was repeated every 2 weeks during 2  
403 months in parallel to the dummy experiment (described below), to verify that temporal  
404 activity was stable over time (Fig. S12).

405

406

407

## 408 ***Dummy butterflies experiment***

409 We investigated the response of patrolling males to sympatric conspecifics, congeners and of  
410 exotic conspecifics, using dummies placed on their flight path. Dummies were built with real  
411 wings dissected and washed with hexane to remove volatile compounds and cuticular  
412 hydrocarbons, ensuring to test only the visual aspect of the dummies. We mounted the wings  
413 on a solar-powered fluttering device (Butterfly Solar Héliobil R029br) that mimics a flying  
414 butterfly, thereby increasing the attractiveness of the dummy. The fluttering dummy was  
415 positioned on the river bank, and placed at the centre of a 1m<sup>3</sup> space delimited with four  
416 vertical stacks (Fig. 1). Patrolling *Morpho* butterflies that deviated from their flight path to  
417 approach the dummy but did not enter the cubic space were categorized as *approaching*. Any  
418 *Morpho* butterfly entering the cubic space was considered as *interacting* with the dummy.  
419 Those passing without showing interest to the setup were categorized as *passing*. All  
420 patrolling individuals were identified at the species level, either visually for *M. menelaus* and  
421 *M. deidamia*, or based on time of the day for *M. helenor* and *M. achilles* (Fig. S12). By  
422 continuously filming the setup using a camera (GoPro Hero5 Black set at 120 images per  
423 second) mounted on a tripod, we also measured the duration of the interactions (*i.e.* the time  
424 spent in the cubic space) occurring between patrolling male and the dummy. The ten dummies  
425 were each tested during 4 sunny days from 9 a.m. to 2 p.m. (*i.e.* during 5 hours). This resulted  
426 in 40 days of experiment over which each dummy was left fluttering on the river bank for a  
427 combined duration of 20 hours. Dummies were randomly attributed to each day of  
428 experiment.

429

## 430 ***Three-dimensional kinematics of flight interaction with the dummies***

431 To test if *Morpho* males shows different flight behaviours when interacting with male and  
432 female dummy, we filmed the flight interactions using two orthogonally positioned video  
433 cameras (GoPro Hero5 Black, recording at 120 images per second) around the dummy setup  
434 (Fig. 1). Stereoscopic video sequences obtained from the two cameras were synchronized  
435 with respect to a reference frame (here using a clapperboard). Prior to each filming session,  
436 the camera system was calibrated with the direct linear transformation (DLT) technique  
437 (Hartley and Zisserman, 2003) by digitizing the positions of a wand moved around the  
438 dummy. Wand tracking was done using DLTdv8 (Hedrick, 2008), and computation of the  
439 DLT coefficients was performed using easyWand (Theriault et al., 2014). After spatial and  
440 temporal calibration, we also used DLTdv8 to digitize the three-dimensional positions of both  
441 the visiting (real) butterfly and the dummy butterfly at each video frame by manually tracking

442 the body centroid in each camera view. Butterfly positions throughout the flight trajectory  
443 were post-processed using a linear Kalman filter (Muijres et al., 2014), providing smoothed  
444 temporal dynamics of spatial position, velocity and acceleration of the body centroid. Based  
445 on these data, we investigated how spatial position, speed and acceleration of the visitor  
446 butterfly varied over the course of the interaction. We proceeded by dividing space into 10 cm  
447 spherical intervals around the dummy position ranging from 0 to 1.2 meters distance, and  
448 computed the proportion of time spent, the mean speed and acceleration of the interacting  
449 butterfly within each distance interval (Fig. 3). We analysed a total of 28 interactions  
450 performed by individual *Morpho achilles* male, including 14 with the dummy of its  
451 conspecific male and 14 with the dummy of its conspecific female. Analysed interactions  
452 lasted in average  $1.44 \pm 0.87$  (mean $\pm$ sd) seconds.

453

#### 454 ***Statistical analysis of behavioural experiments***

455 Differences in patrolling time were assessed by testing the effect of species on time of capture  
456 using Kruskal-Wallis test. To test the effect of visitor identity and dummy characteristics on  
457 the number of approaches and interactions, we performed logistic regressions. *Approach* was  
458 treated as a binary variable, where 0 meant “passing without approaching” and 1 meant  
459 “approaching the dummy setup”. For the interactions, we only considered individuals  
460 approaching the setup, such as 0 meant “approaching without entering the cubic space” and 1  
461 meant “entering the cubic space”. This allowed getting rid of the uncertainties on whether  
462 passing individuals had actually seen the setup or not. We first tested the effect of visiting  
463 species on *approach* and *interaction* while controlling for dummy’s characteristics to test for  
464 intrinsic differences in territoriality (or ‘curiosity’) among species. We then tested the effect  
465 of the dummy sex and identity on *approach* and *interaction* separately in *Morpho helenor* and  
466 *M. achilles*. The day of experiment was also included in the models to control for stochastic  
467 variation during the two-month study. We further tested if variation in wing area and  
468 proportion of iridescent blue among dummies affected the frequency of approach and  
469 interaction, again using logistic regression analyses (Fig. S7). Statistical significance of each  
470 variables was assessed using likelihood ratio tests comparing logistic regression models  
471 (Lewis et al., 2011). Finally, we tested the effect of dummy sex and identity on the duration of  
472 interaction using Kruskal-Wallis tests.

473 Based on the flight kinematic data, we investigated whether flight behaviour during the  
474 interaction differed with male *vs.* female dummies. We used linear regressions to test how  
475 variation in proportion of time spent, speed and acceleration varied with distance from

476 dummy male vs. female during the flight interaction. We also tested for differences in mean  
477 flight distance from dummy between dummy sex using Wilcoxon test.

478

#### 479 **Author Contributions**

480 C.L.R., V.L., and V.D. designed the research. C.L.R., V.L., V.D., C.R., E.A., and H.B.  
481 performed the research. C.L.R., V.L., and V.D. wrote the paper.

482

#### 483 **Acknowledgments**

484 The authors would like to thank the Peruvian authorities, and in particular SERFOR (the  
485 Servicio Nacional Forestal y de Fauna Silvestre) for providing the necessary research permits  
486 (permit: 373-2017-SERFOR-DGGSPFFS). We thank Ronald Mori Pezo for help with the  
487 mark-recapture experiment. C.L.R. acknowledges financial support by Université de Paris and  
488 the Ecole Doctorale FIRE - Program Bettencourt. This work was also supported by a grant  
489 from Agence National de la Recherche under the LabEx ANR-10-LABX-0003-BCDiv, in the  
490 program “Investissements d’avenir” n ANR-11-IDEX-0004-02” to C.L.R and from the  
491 Emergence program of Paris city council to V.L.

492

493

#### 494 **References**

495 **Abrams, P.** (1983). The theory of limiting similarity. *Annual review of Ecology and Systematics*  
496 **14**, 359-376.

497 **Aubier, T. G.** (2020). Positive density dependence acting on mortality can help maintain  
498 species-rich communities. *Elife* **9**, e57788.

499 **Aubier, T. G., Elias, M., Llaurens, V. and Chazot, N.** (2017). Mutualistic mimicry enhances  
500 species diversification through spatial segregation and extension of the ecological niche space.  
501 *Evolution* **71**, 826-844.

502 **Baillargeon, S. and Rivest, L.-P.** (2007). Rcapture: loglinear models for capture-recapture in  
503 R. *Journal of statistical software* **19**, 1-31.

504 **Baird, N. A., Etter, P. D., Atwood, T. S., Currey, M. C., Shiver, A. L., Lewis, Z. A., Selker, E. U.,  
505 Cresko, W. A. and Johnson, E. A.** (2008). Rapid SNP discovery and genetic mapping using sequenced  
506 RAD markers. *PLoS One* **3**, e3376.

507 **Bolnick, D. I. and Fitzpatrick, B. M.** (2007). Sympatric speciation: models and empirical  
508 evidence. *Annu. Rev. Ecol. Evol. Syst.* **38**, 459-487.

509 **Brown, W. L. and Wilson, E. O.** (1956). Character displacement. *Systematic zoology* **5**, 49-64.

510 **Callaghan, C. J.** (1982). A study of isolating mechanisms among Neotropical butterflies of the  
511 subfamily Riodininae. *Journal of Research on the Lepidoptera* **21**, 159-176.

512 **Catchen, J., Hohenlohe, P. A., Bassham, S., Amores, A. and Cresko, W. A.** (2013). Stacks: an  
513 analysis tool set for population genomics. *Molecular Ecology* **22**, 3124-3140.

514 **Catchen, J. M., Amores, A., Hohenlohe, P., Cresko, W. and Postlethwait, J. H.** (2011). Stacks:  
515 building and genotyping loci de novo from short-read sequences. *G3: Genes, genomes, genetics* **1**,  
516 171-182.

- 517 **Charlesworth, B., Morgan, M. and Charlesworth, D.** (1993). The effect of deleterious  
518 mutations on neutral molecular variation. *Genetics* **134**, 1289-1303.
- 519 **Chazot, N., Panara, S., Zilbermann, N., Blandin, P., Le Poul, Y., Cornette, R., Elias, M. and**  
520 **Debat, V.** (2016). Morpho morphometrics: Shared ancestry and selection drive the evolution of wing  
521 size and shape in Morpho butterflies. *Evolution* **70**, 181-194.
- 522 **Chivers, D., Mirza, R. and Johnston, J.** (2002). Learned recognition of heterospecific alarm  
523 cues enhances survival during encounters with predators. *Behaviour* **139**, 929-938.
- 524 **Cruickshank, T. E. and Hahn, M. W.** (2014). Reanalysis suggests that genomic islands of  
525 speciation are due to reduced diversity, not reduced gene flow. *Molecular Ecology* **23**, 3133-3157.
- 526 **Dalesman, S. and Rundle, S. D.** (2010). Cohabitation enhances the avoidance response to  
527 heterospecific alarm cues in a freshwater snail. *Animal Behaviour* **79**, 173-177.
- 528 **Darragh, K., Vanjari, S., Mann, F., Gonzalez-Rojas, M. F., Morrison, C. R., Salazar, C., Pardo-**  
529 **Diaz, C., Merrill, R. M., McMillan, W. O. and Schulz, S.** (2017). Male sex pheromone components in  
530 Heliconius butterflies released by the androconia affect female choice. *PeerJ* **5**, e3953.
- 531 **Dasmahapatra, K. K., Walters, J. R., Briscoe, A. D., Davey, J. W., Whibley, A., Nadeau, N. J.,**  
532 **Zimin, A. V., Hughes, D. S., Ferguson, L. C. and Martin, S. H.** (2012). Butterfly genome reveals  
533 promiscuous exchange of mimicry adaptations among species. In *Nature*, vol. 487, pp. 94.
- 534 **Debat, V., Berthier, S., Blandin, P., Chazot, N., Elias, M., Gomez, D. and Llaurens, V.** (2018).  
535 Why are Morpho Blue? In *Biodiversity and Evolution*, pp. 139-174: Elsevier.
- 536 **Devries, P. J., Austin, G. T. and Martin, N. H.** (2008). Diel activity and reproductive isolation  
537 in a diverse assemblage of Neotropical skippers (Lepidoptera: Hesperidae). *Biological Journal of the*  
538 *Linnean Society* **94**, 723-736.
- 539 **Drury, J. P., Cowen, M. C. and Grether, G. F.** (2020). Competition and hybridization drive  
540 interspecific territoriality in birds. *Proceedings of the National Academy of Sciences* **117**, 12923-  
541 12930.
- 542 **Drury, J. P., Okamoto, K. W., Anderson, C. N. and Grether, G. F.** (2015). Reproductive  
543 interference explains persistence of aggression between species. *Proceedings of the Royal Society B:*  
544 *Biological Sciences* **282**, 20142256.
- 545 **Elias, M., Gompert, Z., Jiggins, C. and Willmott, K.** (2008). Mutualistic interactions drive  
546 ecological niche convergence in a diverse butterfly community. *PLoS biology* **6**.
- 547 **Estrada, C. and Jiggins, C. D.** (2008). Interspecific sexual attraction because of convergence in  
548 warning colouration: is there a conflict between natural and sexual selection in mimetic species?  
549 *Journal of Evolutionary Biology* **21**, 749-760.
- 550 **Fordyce, J., Nice, C., Forister, M. and Shapiro, A.** (2002). The significance of wing pattern  
551 diversity in the Lycaenidae: mate discrimination by two recently diverged species. *Journal of*  
552 *Evolutionary Biology* **15**, 871-879.
- 553 **Fraisse, C., Popovic, I., Romiguier, J., Loire, E., Simon, A., Galtier, N., Duret, L., Bierne, N.,**  
554 **Vekemans, X. and Roux, C.** (2020). DILS: Demographic Inferences with Linked Selection by using ABC.  
555 *bioRxiv*.
- 556 **Freitas, A. V., Benson, W. W., Marini-Filho, O. J. and De Carvalho, R. M.** (1997). Territoriality  
557 by the dawn's early light: the Neotropical owl butterfly *Caligo idomenaeus*(Nymphalidae:  
558 Brassolinae). *Journal of Research on the Lepidoptera* **34**, 14-20.
- 559 **Garcia, C. R., Gallusser, S., Lachaume, L. and Blandin, P.** (2014). The ecology and life cycle of  
560 the Amazonian Morpho cisseis phanodemus Hewitson, 1869, with a comparative review of early  
561 stages in the genus Morpho (Lepidoptera: Nymphalidae: Morphinae). *Tropical Lepidoptera Research*  
562 **24**, 67-80.
- 563 **Gompert, Z., Willmott, K. and Elias, M.** (2011). Heterogeneity in predator micro-habitat use  
564 and the maintenance of Müllerian mimetic diversity. *Journal of theoretical biology* **281**, 39-46.
- 565 **Grant, P. R. and Grant, B. R.** (2006). Evolution of character displacement in Darwin's finches.  
566 *Science* **313**, 224-226.



- 567 **Grether, G. F., Peiman, K. S., Tobias, J. A. and Robinson, B. W.** (2017). Causes and  
568 consequences of behavioral interference between species. *Trends in ecology & evolution* **32**, 760-  
569 772.
- 570 **Gröning, J. and Hochkirch, A.** (2008). Reproductive interference between animal species. *The*  
571 *Quarterly Review of Biology* **83**, 257-282.
- 572 **Groot, A. T.** (2014). Circadian rhythms of sexual activities in moths: a review. *Frontiers in*  
573 *Ecology and Evolution* **2**, 43.
- 574 **Hartley, R. and Zisserman, A.** (2003). Multiple view geometry in computer vision: Cambridge  
575 university press.
- 576 **Hedrick, T. L.** (2008). Software techniques for two-and three-dimensional kinematic  
577 measurements of biological and biomimetic systems. *Bioinspiration & biomimetics* **3**, 034001.
- 578 **Hewitt, G.** (2000). The genetic legacy of the Quaternary ice ages. *Nature* **405**, 907-913.
- 579 **Hirota, T., Hamano, K. and Obara, Y.** (2001). The influence of female post-emergence  
580 behavior on the time schedule of male mate-locating in *Pieris rapae crucivora*. *Zoological Science* **18**,  
581 475-482.
- 582 **Huerta-Sánchez, E., Jin, X., Bianba, Z., Peter, B. M., Vinckenbosch, N., Liang, Y., Yi, X., He,**  
583 **M., Somel, M. and Ni, P.** (2014). Altitude adaptation in Tibetans caused by introgression of  
584 Denisovan-like DNA. *Nature* **512**, 194-197.
- 585 **Iwasa, Y. and Obara, Y.** (1989). A game model for the daily activity schedule of the male  
586 butterfly. *Journal of insect behavior* **2**, 589-608.
- 587 **Kemp, D. J.** (2013). Contest behaviour in butterflies: fighting without weapons. In *Animal*  
588 *Contests* (I.C.W. Hardy & M. Briffa, eds), pp. 134–146. Cambridge University Press, Cambridge.
- 589 **Kemp, D. J. and Rutowski, R. L.** (2001). Spatial and temporal patterns of territorial mate  
590 locating behaviour in *Hypolimnas bolina* (L.)(Lepidoptera: Nymphalidae). *Journal of Natural History*  
591 **35**, 1399-1411.
- 592 **Kyogoku, D.** (2015). Reproductive interference: ecological and evolutionary consequences of  
593 interspecific promiscuity. *Population ecology* **57**, 253-260.
- 594 **Kyogoku, D. and Nishida, T.** (2013). The mechanism of the fecundity reduction in  
595 *Callosobruchus maculatus* caused by *Callosobruchus chinensis* males. *Population ecology* **55**, 87-93.
- 596 **Lewis, F., Butler, A. and Gilbert, L.** (2011). A unified approach to model selection using the  
597 likelihood ratio test. *Methods in Ecology and Evolution* **2**, 155-162.
- 598 **Losin, N., Drury, J. P., Peiman, K. S., Storch, C. and Grether, G. F.** (2016). The ecological and  
599 evolutionary stability of interspecific territoriality. *Ecology letters* **19**, 260-267.
- 600 **MacArthur, R. and Levins, R.** (1967). The limiting similarity, convergence, and divergence of  
601 coexisting species. *The American Naturalist* **101**, 377-385.
- 602 **Mérot, C., Frérot, B., Leppik, E. and Joron, M.** (2015). Beyond magic traits: multimodal  
603 mating cues in *Heliconius* butterflies. *Evolution* **69**, 2891-2904.
- 604 **Muijres, F. T., Elzinga, M. J., Melis, J. M. and Dickinson, M. H.** (2014). Flies evade looming  
605 targets by executing rapid visually directed banked turns. *Science* **344**, 172-177.
- 606 **Müller, F.** (1879). Ituna and Thyridia: a remarkable case of mimicry in butterflies. *Trans.*  
607 *Entomol. Soc. Lond* **1879**, 20-29.
- 608 **Murali, G.** (2018). Now you see me, now you don't: Dynamic flash coloration as an  
609 antipredator strategy in motion. *Animal Behaviour* **142**, 207-220.
- 610 **Páez, E., Valkonen, J. K., Willmott, K. R., Matos-Maraví, P., Elias, M. and Mappes, J.** (2020).  
611 Hard to catch: Experimental evidence supports evasive mimicry. *bioRxiv*.
- 612 **Paris, J. R., Stevens, J. R. and Catchen, J. M.** (2017). Lost in parameter space: a road map for  
613 stacks. *Methods in Ecology and Evolution* **8**, 1360-1373.
- 614 **Pinheiro, C. E. and Campos, V. C.** (2019). The responses of wild jacamars (*Galbula ruficauda*,  
615 *Galbulidae*) to aposematic, aposematic and cryptic, and cryptic butterflies in central Brazil. *Ecological*  
616 *Entomology* **44**, 441-450.
- 617 **Pudlo, P., Marin, J.-M., Estoup, A., Cornuet, J.-M., Gautier, M. and Robert, C. P.** (2014). ABC  
618 model choice via random forests. *ArXiv e-prints* **1406**, v2.

- 619 **Raynal, L., Marin, J.-M., Pudlo, P., Ribatet, M., Robert, C. P. and Estoup, A.** (2019). ABC  
620 random forests for Bayesian parameter inference. *Bioinformatics* **35**, 1720-1728.
- 621 **Robinson, S. K. and Terborgh, J.** (1995). Interspecific aggression and habitat selection by  
622 Amazonian birds. *Journal of Animal Ecology*, 1-11.
- 623 **Roux, C., Fraïsse, C., Castric, V., Vekemans, X., Pogson, G. and Bierne, N.** (2014). Can we  
624 continue to neglect genomic variation in introgression rates when inferring the history of speciation?  
625 A case study in a *M. ytilus* hybrid zone. *Journal of Evolutionary Biology* **27**, 1662-1675.
- 626 **Roux, C., Fraïsse, C., Romiguier, J., Anciaux, Y., Galtier, N. and Bierne, N.** (2016). Shedding  
627 light on the grey zone of speciation along a continuum of genomic divergence. *PLoS biology* **14**,  
628 e2000234.
- 629 **Saetre, G.-P., Moum, T., Bures, S., Kral, M., Adamjan, M. and Moreno, J.** (1997). A sexually  
630 selected character displacement in flycatchers reinforces premating isolation. *Nature* **387**, 589-592.
- 631 **Schöfl, G., Heckel, D. G. and Groot, A.** (2009). Time-shifted reproductive behaviours among  
632 fall armyworm (Noctuidae: Spodoptera frugiperda) host strains: evidence for differing modes of  
633 inheritance. *Journal of Evolutionary Biology* **22**, 1447-1459.
- 634 **Servedio, M. R. and Noor, M. A.** (2003). The role of reinforcement in speciation: theory and  
635 data. *Annual Review of Ecology, Evolution, and Systematics* **34**, 339-364.
- 636 **Sherratt, T. N. and Beatty, C. D.** (2003). The evolution of warning signals as reliable indicators  
637 of prey defense. *The American Naturalist* **162**, 377-389.
- 638 **Smadja, C. and Ganem, G.** (2008). Divergence of odorant signals within and between the two  
639 European subspecies of the house mouse. *Behavioral ecology* **19**, 223-230.
- 640 **Souriau, A., Kohoutová, H., Reif, J., Vokurková, J., Petrusek, A., Reifová, R. and Petrusková,**  
641 **T.** (2018). Can mixed singing facilitate coexistence of closely related nightingale species? *Behavioral*  
642 *ecology* **29**, 925-932.
- 643 **Takeuchi, T.** (2017). Agonistic display or courtship behavior? A review of contests over  
644 mating opportunity in butterflies. *Journal of ethology* **35**, 3-12.
- 645 **Taylor, R. S. and Friesen, V. L.** (2017). The role of allochrony in speciation. *Molecular Ecology*  
646 **26**, 3330-3342.
- 647 **Therault, D. H., Fuller, N. W., Jackson, B. E., Bluhm, E., Evangelista, D., Wu, Z., Betke, M.**  
648 **and Hedrick, T. L.** (2014). A protocol and calibration method for accurate multi-camera field  
649 videography. *Journal of Experimental Biology*, jeb. 100529.
- 650 **Tobias, J. A. and Seddon, N.** (2009). Signal design and perception in *Hypocnemis* antbirds:  
651 evidence for convergent evolution via social selection. *Evolution: International Journal of Organic*  
652 *Evolution* **63**, 3168-3189.
- 653 **Vekemans, X.** (2010). What's good for you may be good for me: evidence for adaptive  
654 introgression of multiple traits in wild sunflower. *The New Phytologist* **187**, 6-9.
- 655 **Welch, J. J.** (2004). Accumulating Dobzhansky-Muller incompatibilities: reconciling theory  
656 and data. *Evolution* **58**, 1145-1156.
- 657 **Wiens, J. J. and Graham, C. H.** (2005). Niche conservatism: integrating evolution, ecology,  
658 and conservation biology. *Annu. Rev. Ecol. Evol. Syst.* **36**, 519-539.
- 659 **Willmott, K. R. and Mallet, J.** (2004). Correlations between adult mimicry and larval host  
660 plants in ithomiine butterflies. *Proceedings of the Royal Society of London. Series B: Biological*  
661 *Sciences* **271**, S266-S269.
- 662 **Young, A. M.** (1971). Wing coloration and reflectance in *Morpho* butterflies as related to  
663 reproductive behavior and escape from avian predators. *Oecologia* **7**, 209-222.

664

665

666

## Figures and tables

667

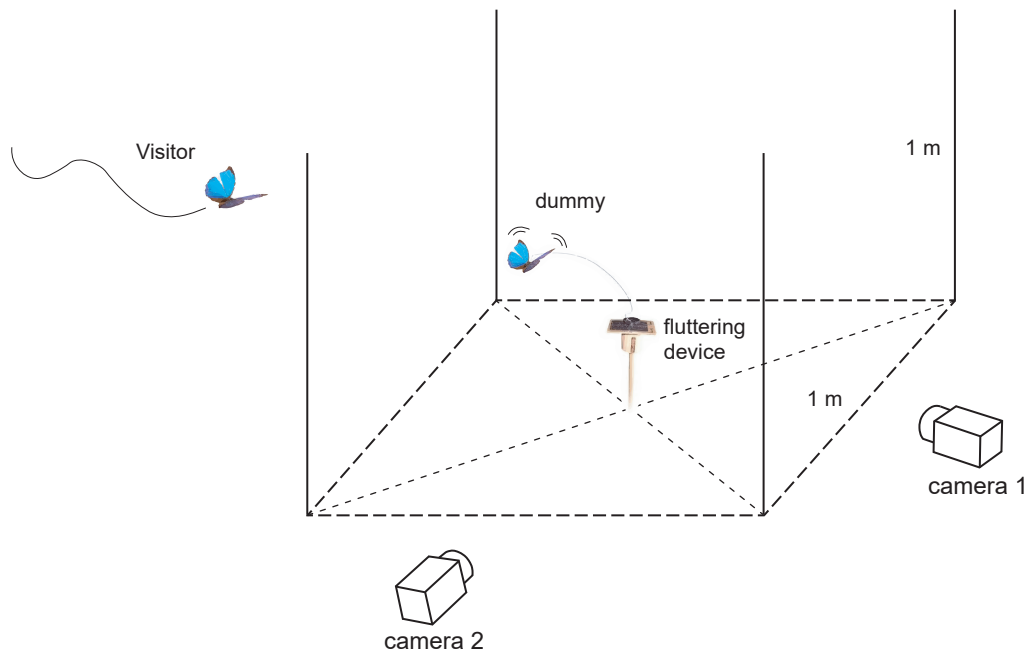

**Fig. 1. Experimental set up used to study flight interaction.** The dummy butterfly was placed at the centre of a cubic area materialized by four 1 m<sup>3</sup> –sticks, and fixed to a solar-powered fluttering device reproducing butterfly flying behaviour. Interaction between visitor and dummy butterfly (defined as a visitor entering in the cubic area) were recorded using stereoscopic high-speed videography system, allowing to quantify flight trajectory during the interaction (see Fig. 3).



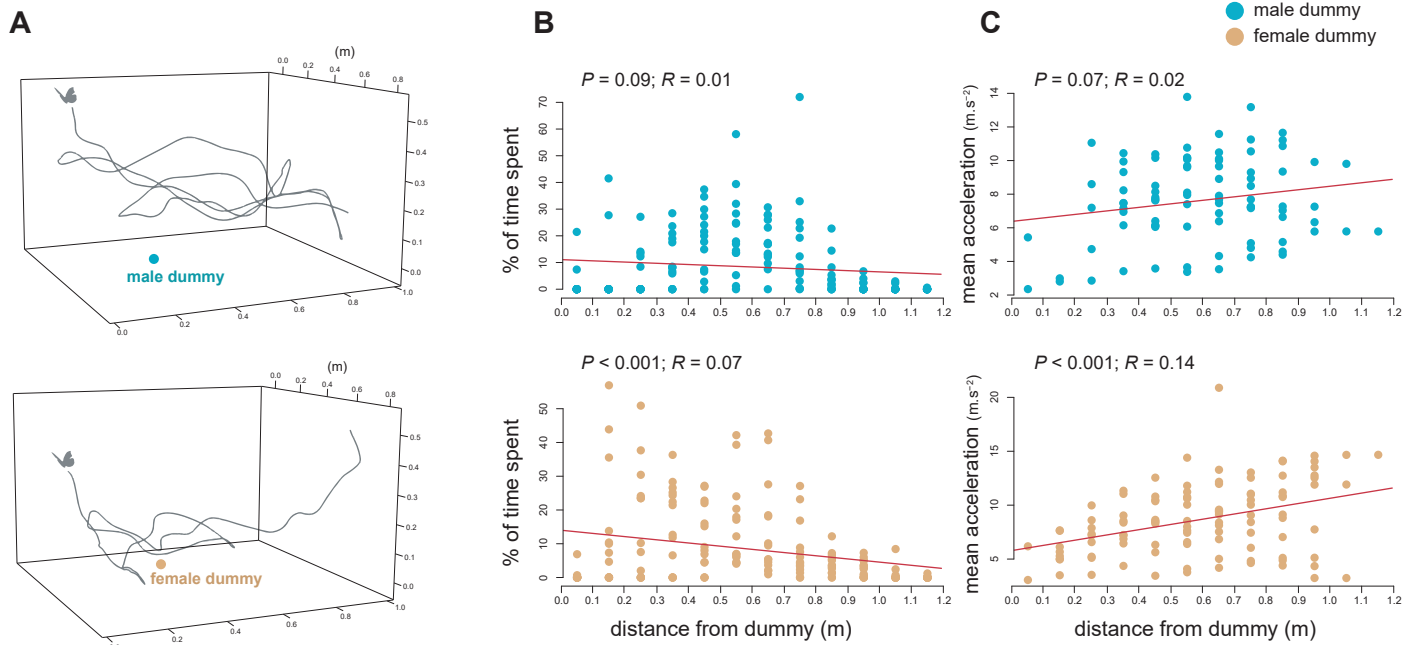

**Figure 3. Three-dimensional kinematic of contest and courtship flights.** (A) Example of flight path when circling around the dummy conspecific male (top) and female (bottom). (B) The proportion of time spent circling at short-distance from the dummy significantly increases for dummy female only. (C) A significantly positive relationship between acceleration and distance from dummy is observed for dummy female only.  $N = 14$  flight interactions analysed with the dummy male and 14 with the dummy female.

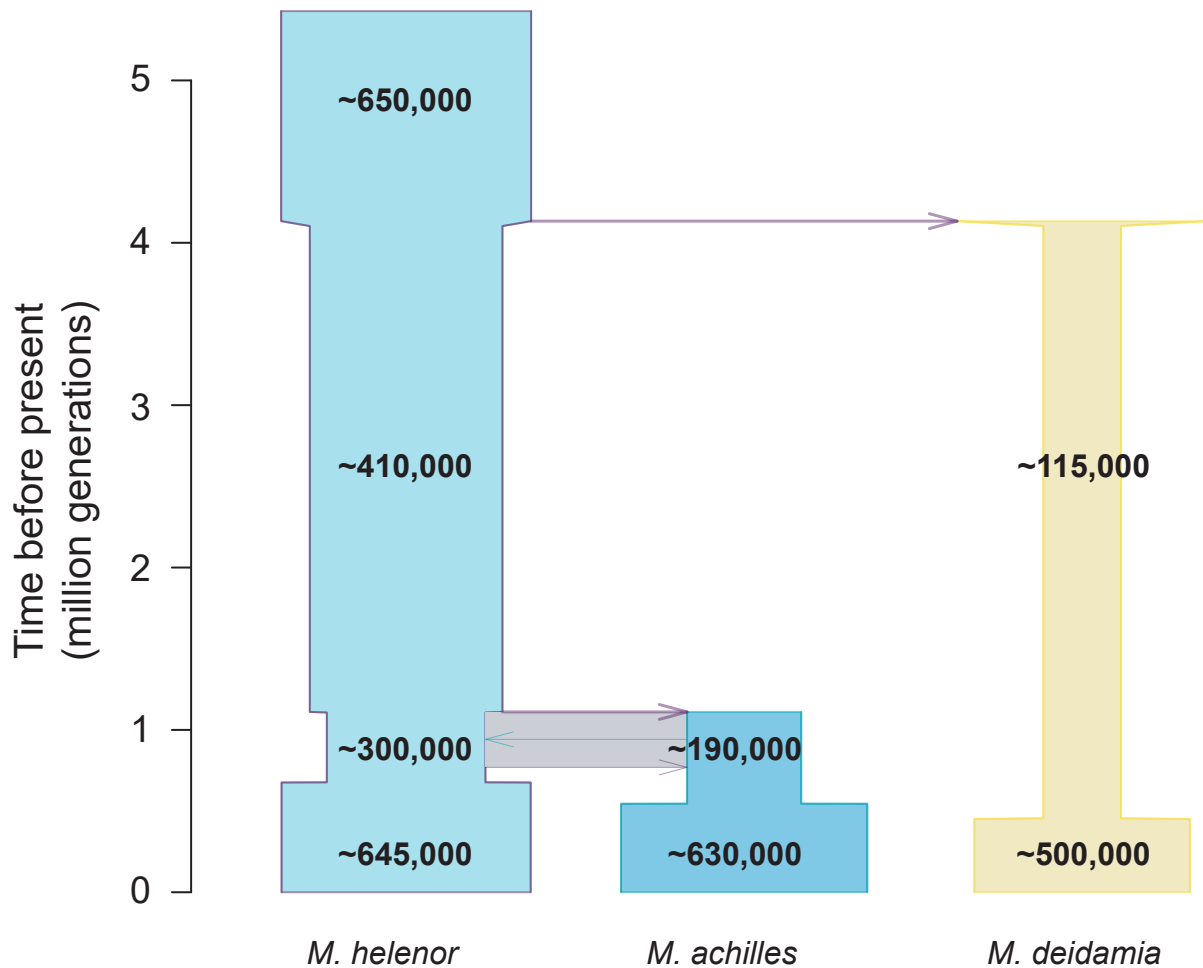

**Fig. 4.** Best inferred demographic scenario from RAD-sequencing data. Eight categories of scenarios were compared according to different temporal patterns of gene flow: between *M. helenor* and *M. achilles* (ancestral migration or secondary contact); with *M. deidamia* (strict isolation, migration only with *M. helenor*, migration only with *M. achilles*, migration between the 3 species). The times of demographic events (speciation, cessation of migration and changes in population size) are shown on the Y-axis in millions of generations. The grey rectangle indicates the period when *M. helenor* and *M. achilles* were, according to the demographic model fitting the best the molecular dataset, genetically connected through migration events.

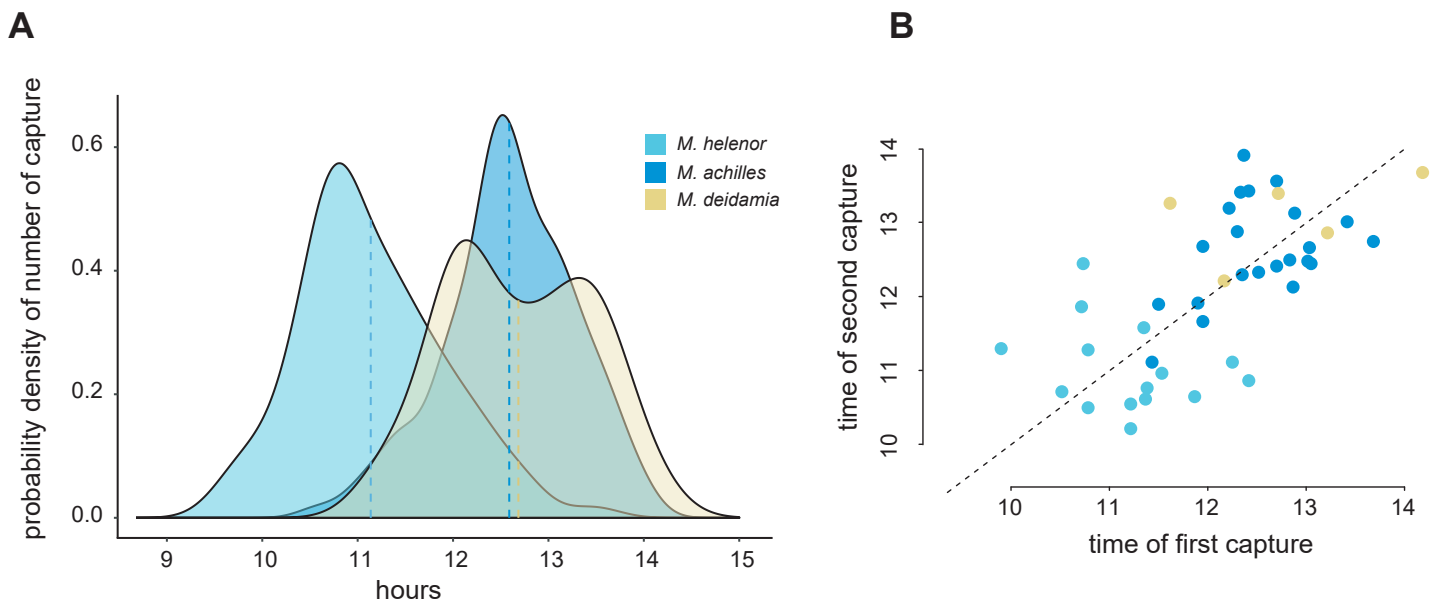

**Fig. 5. Patrolling time among sympatric species and individuals.** (A) Segregation of patrolling time over the day among *Morpho* species. Dashed vertical lines indicate the mean flight time. (B) Plot of first versus second capture time among recaptured individuals. Dashed line represents exact same time between first and second capture.

### Capture history of *M. helenor*

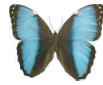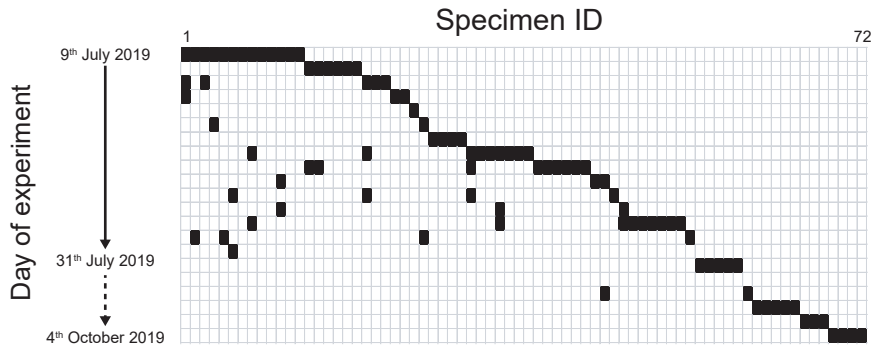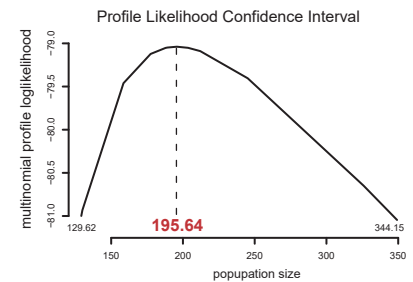

### Capture history of *M. achilles*

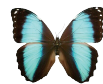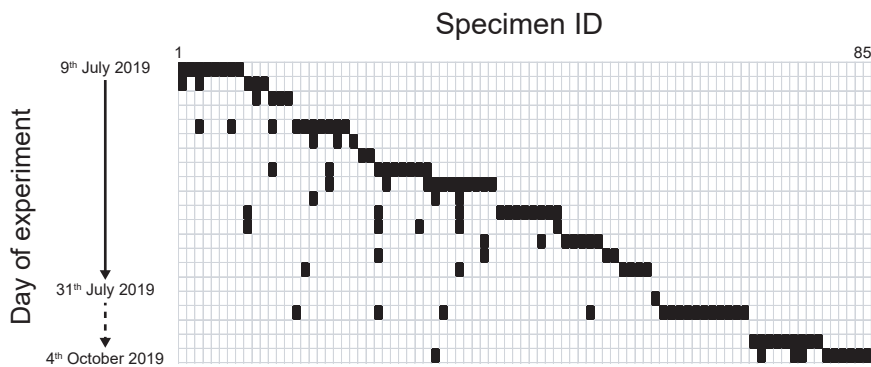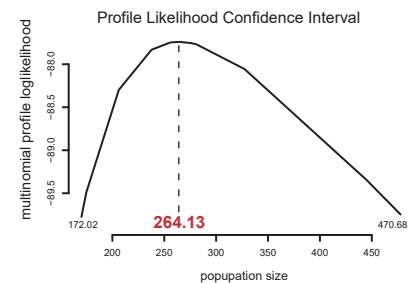

**Fig. S1. Estimating population size from mark-recapture data.** Capture history is shown for the two mimetic sister species *M. helenor* (top) and *M. achilles* (bottom). It gives the capture status on each day of experiment: caught (black boxes) or uncaught (white boxes). Days of experiment along the continuous arrow were nearly consecutive, while those along the dashed arrow were performed every 2 weeks.

Based on capture-recapture histories, we estimated individual abundance for each species using a loglinear model implemented in the R package Rcapture (Baillargeon & Rivest 2007), assuming constant population size throughout the experiment. The likelihood confidence interval of the population sizes is shown on the right column.



## Males

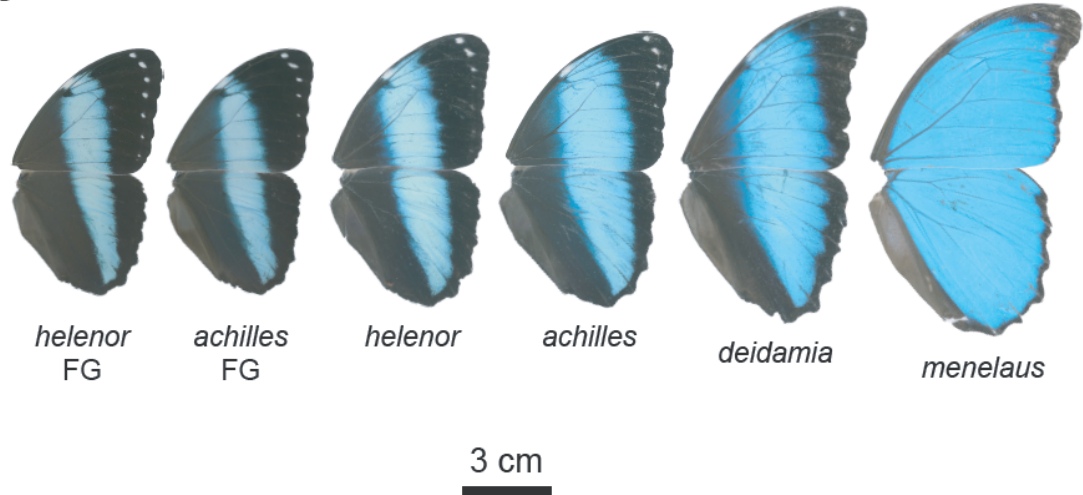

## Females

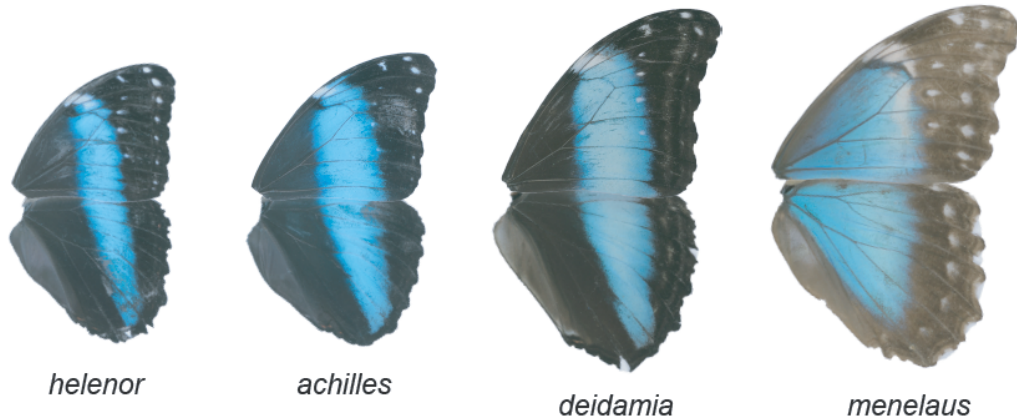

**Fig. S2. Wings of *Morpho* butterflies used for the dummy experiment.** 'FG' indicates exotic dummies from French Guiana. All other dummies were built with wings from Peruvian individuals. Wings are shown at their relative size.

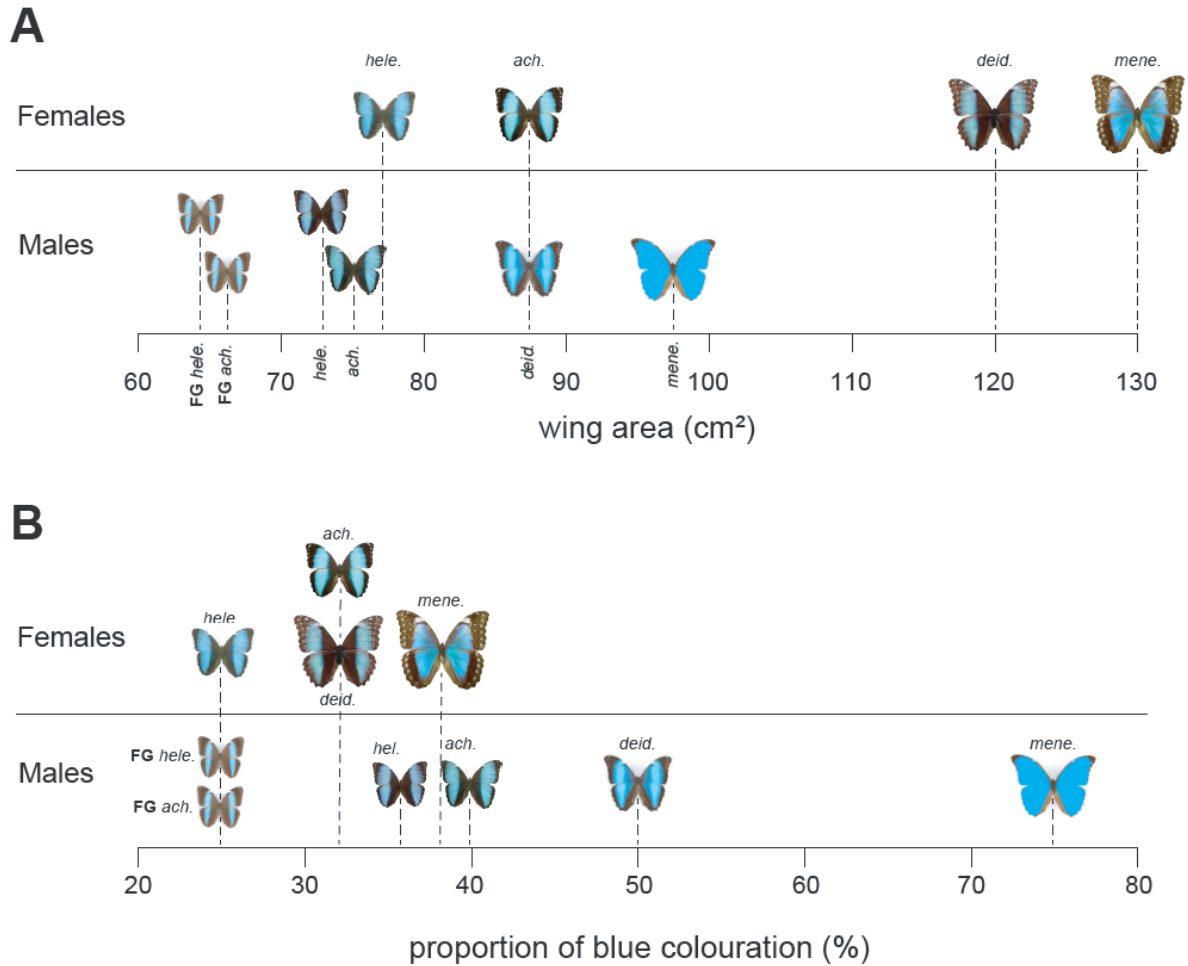

**Fig. S3.** (A) Variation in wing area and (B) in proportion of blue colouration among the tested dummy butterflies. 'FG' indicates exotic dummies from French Guiana. All other dummies were build with wings from Peruvian individuals.

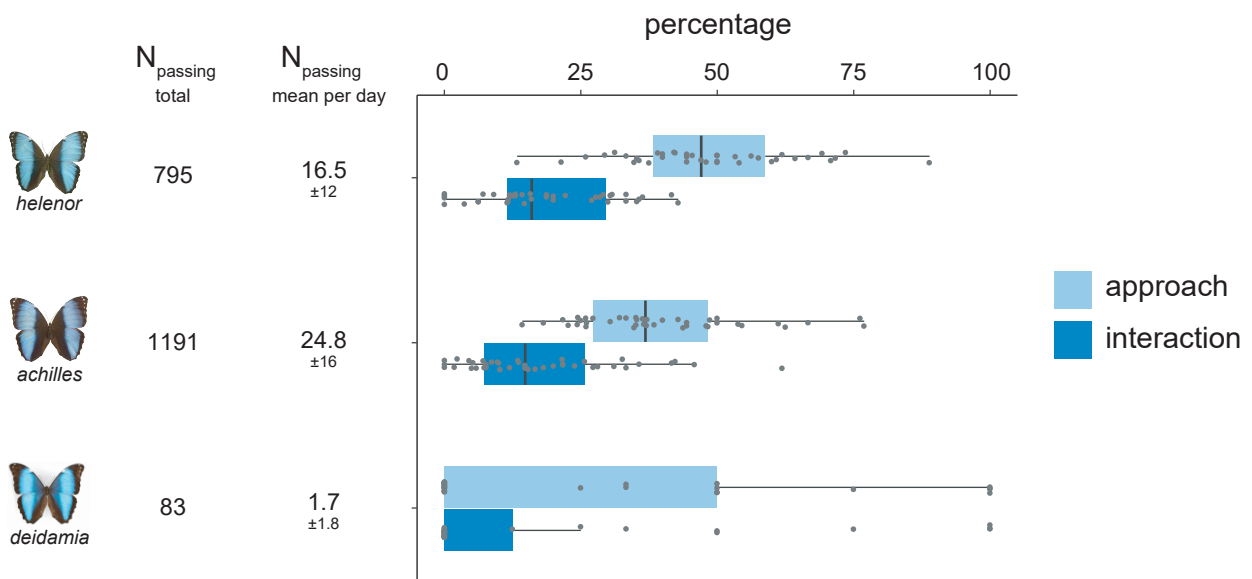

**Fig. S4. Percentage of approach and interaction with the dummy butterfly (all dummy identity and sex confounded) among sympatric *Morpho* species.** Percentage were computed over the number of passing individuals along the river. Total number of passing *Morpho* (in 40 day of experiment) and mean per day is indicated on the left. Each point on the boxplot represent a different day of experiment.

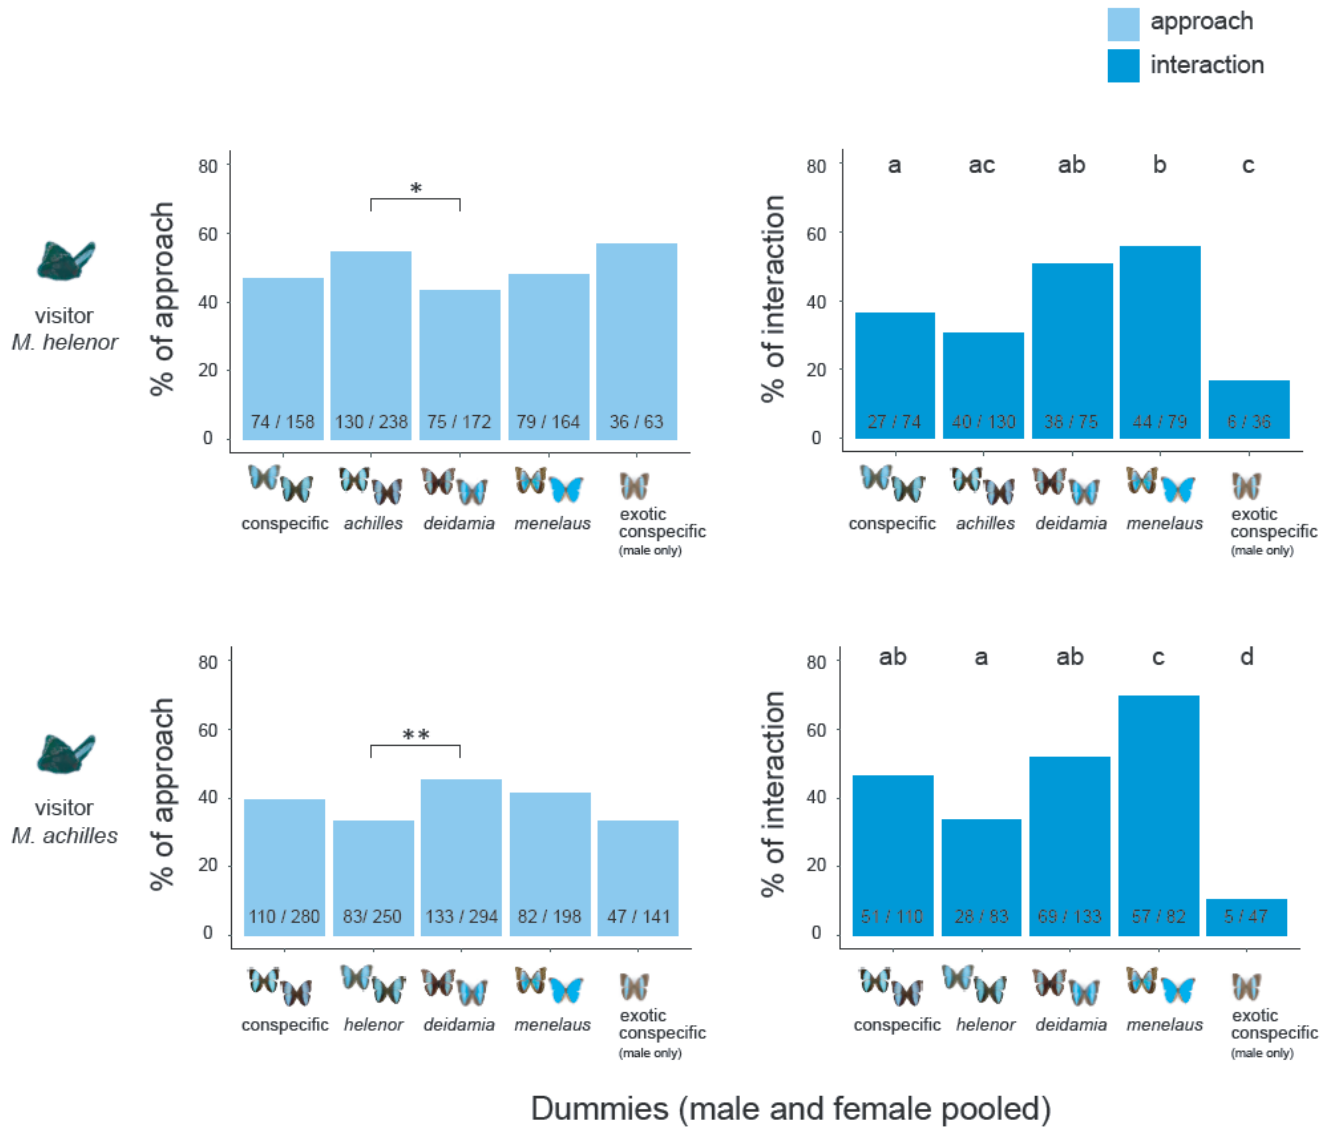

Dummies (male and female pooled)

**Fig. S5. Variation in approach (left column) and interaction (right column) frequency with conspecific and congener dummies in two mimetic sister *Morpho* species (males and females dummies pooled).** Female and male dummies are pooled together, excepted for the exotic dummies where only males were tested. Raw data « nb of approaches / nb of passing » are indicated on barplots of the left column. « nb of interaction/ nb of approaches » are indicated on barplot of the right column.

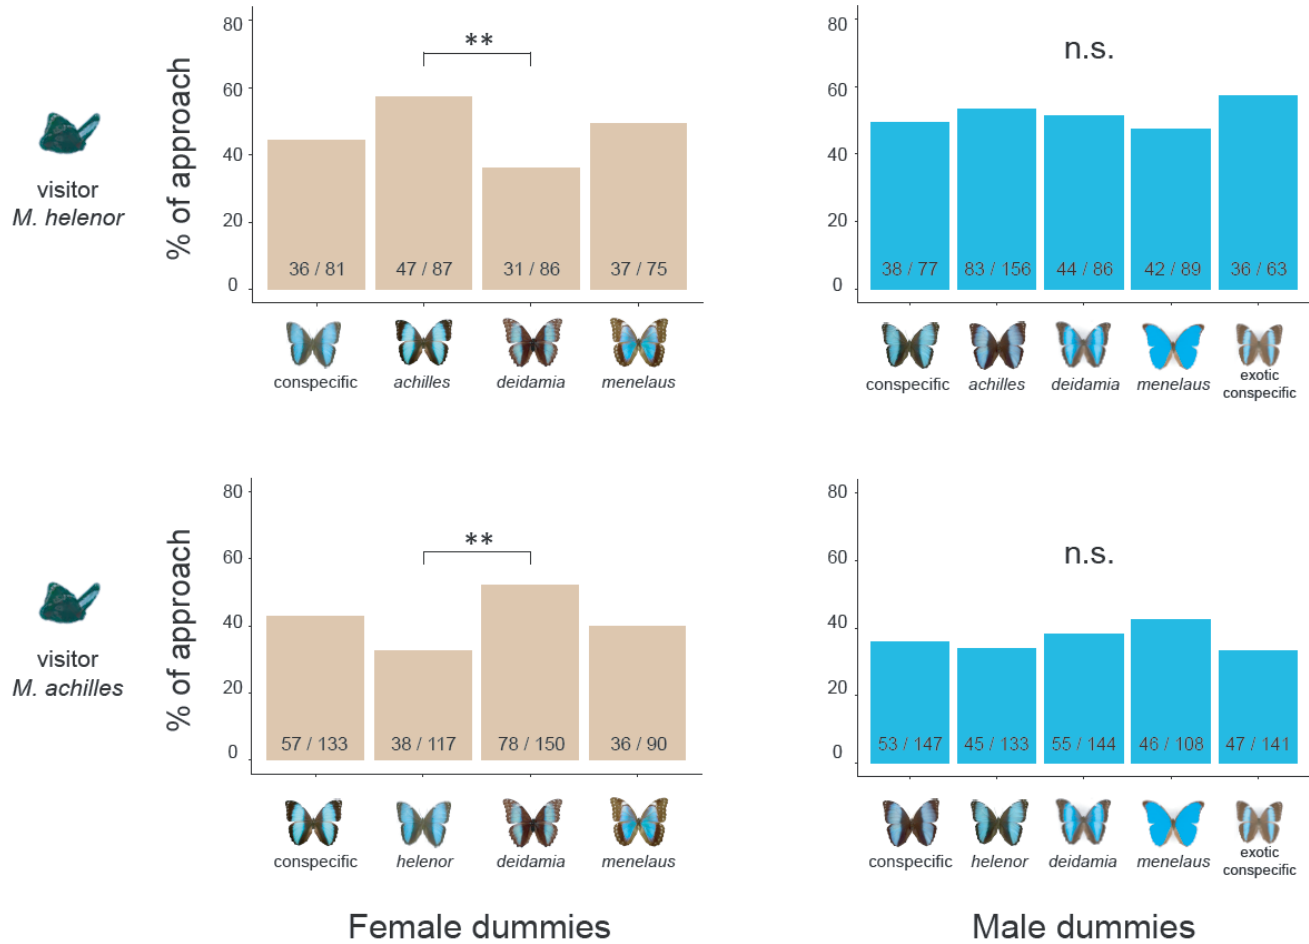

**Fig. S6. Variation in approach frequency with conspecific and congeneric dummies in two mimetic sister *Morpho* species.** Raw data « nb of approaches / nb of passing » are indicated on each barplot.

### Visitor *M. helenor*

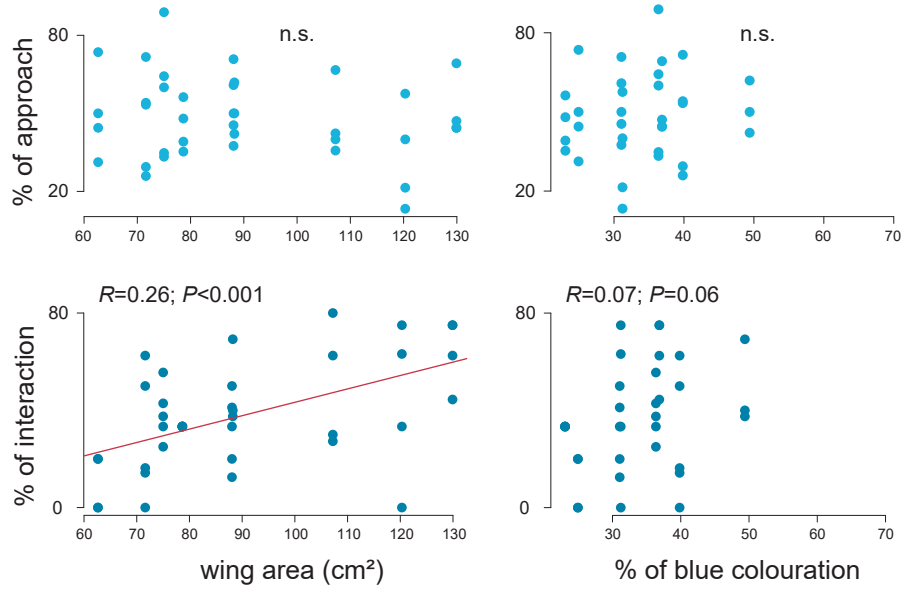

### Visitor *M. achilles*

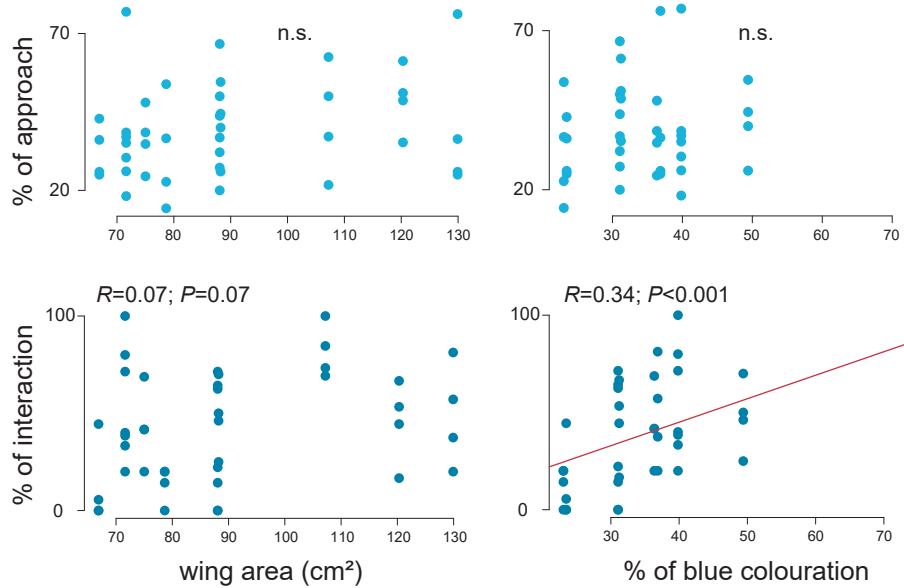

**Fig. S7.** The percentage of approach (top row, light blue) and the percentage of interaction (bottom row, dark blue) are shown in relation to the area and the proportion of blue colouration on the dummy wings. Top panel: visitor *M. helenor*. Bottom panel visitor *M. achilles*. Regression lines are plotted in cases of significant relationships.

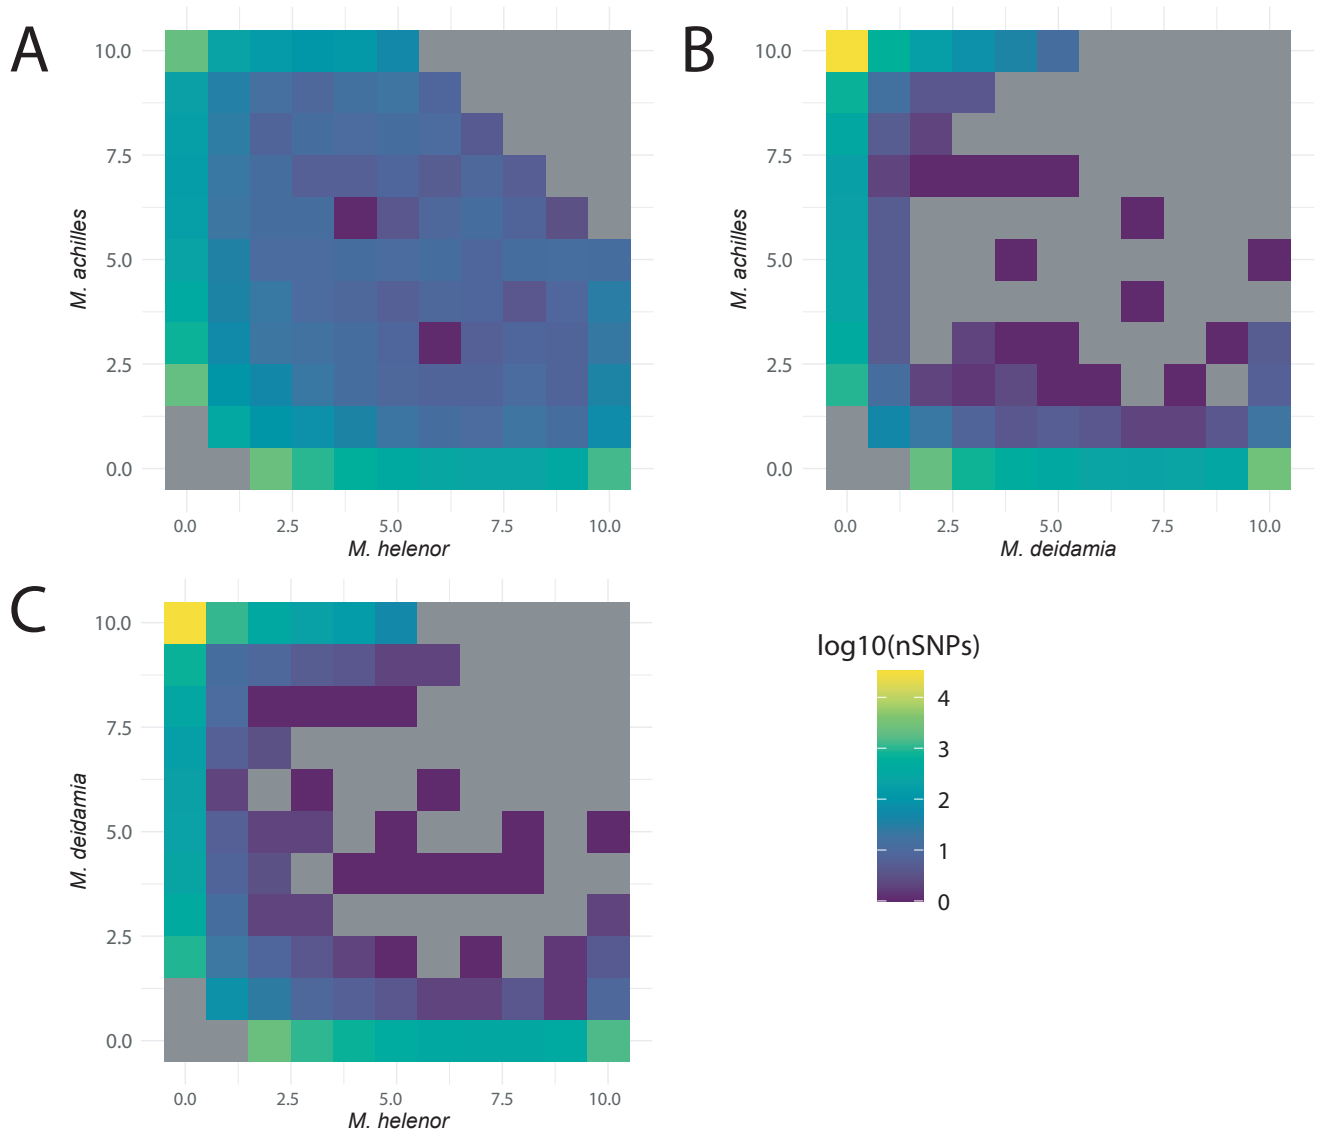

**Fig. S8. Joint spectra of the allelic frequencies between *M. helenor*, *M. achilles* and *M. deidamia*.**

Folded spectrum based on the frequency of the minority allele for each polymorphic position when the three species are aligned. The intraspecific singletons have been removed from the graphical representation to avoid upscaling. Spectra are represented on the  $\log_{10}$  scale for three different pairs A) *M. helenor* – *M. achilles*; B) *M. deidamia* – *M. achilles*; C) *M. helenor* – *M. deidamia*.

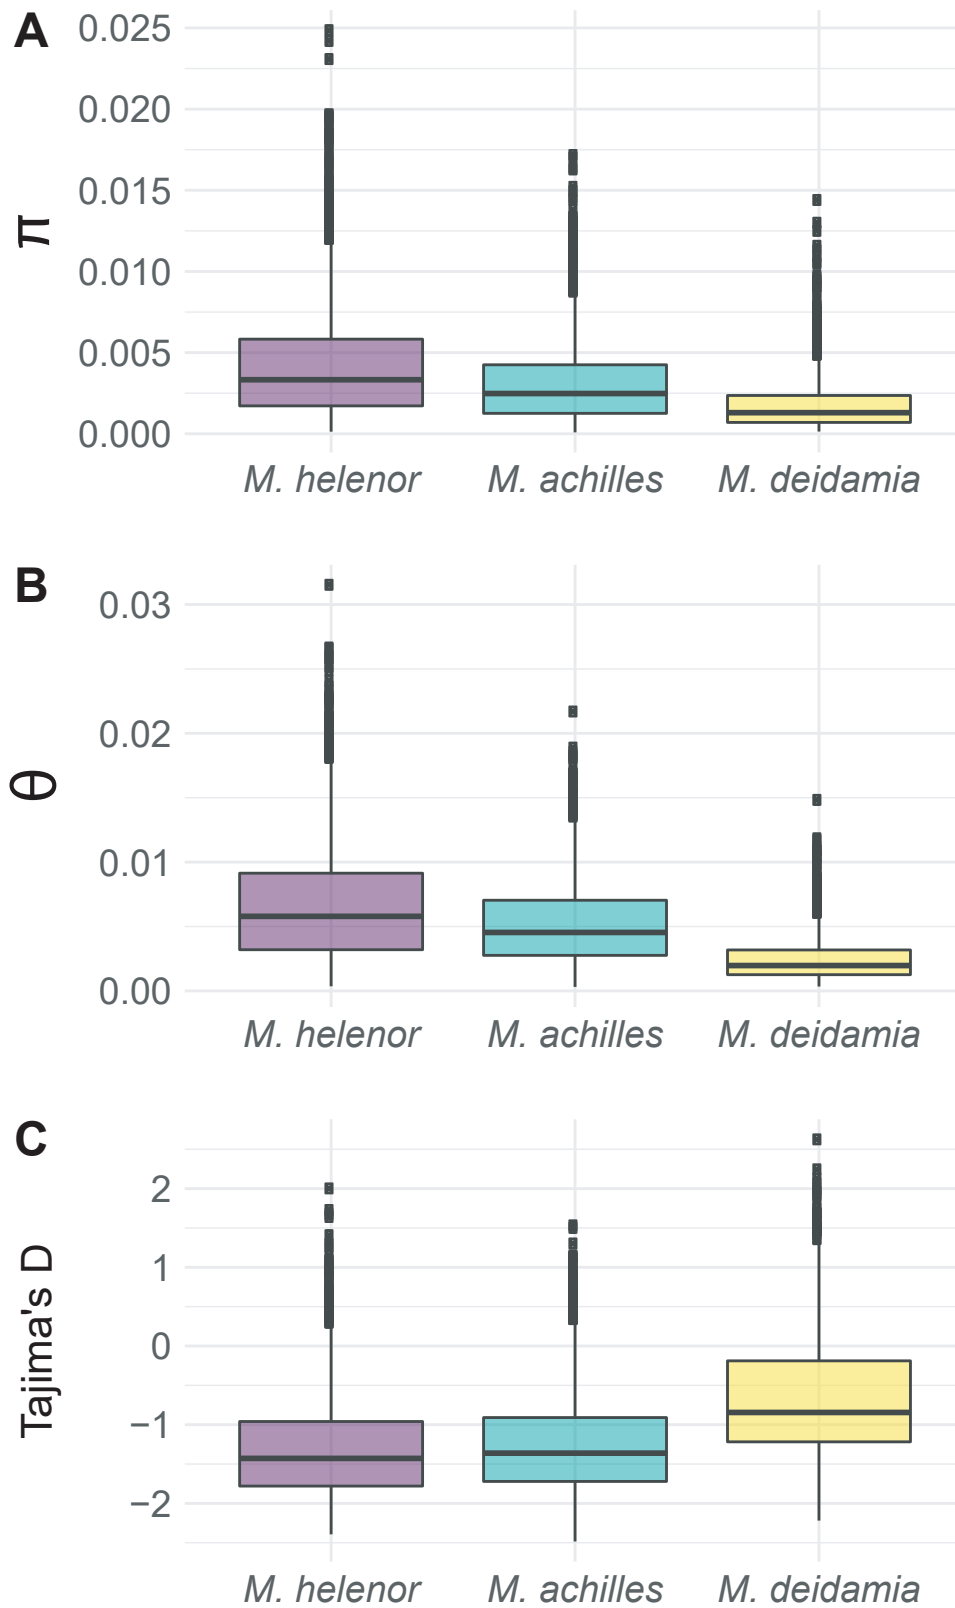

**Fig. S9. Patterns of within-species molecular diversity.**

**A)**  $\pi$  (Tajima, 1983); **B)**  $\theta$  (Watterson, 1975); **C)** Tajima's D (Tajima, 1989).



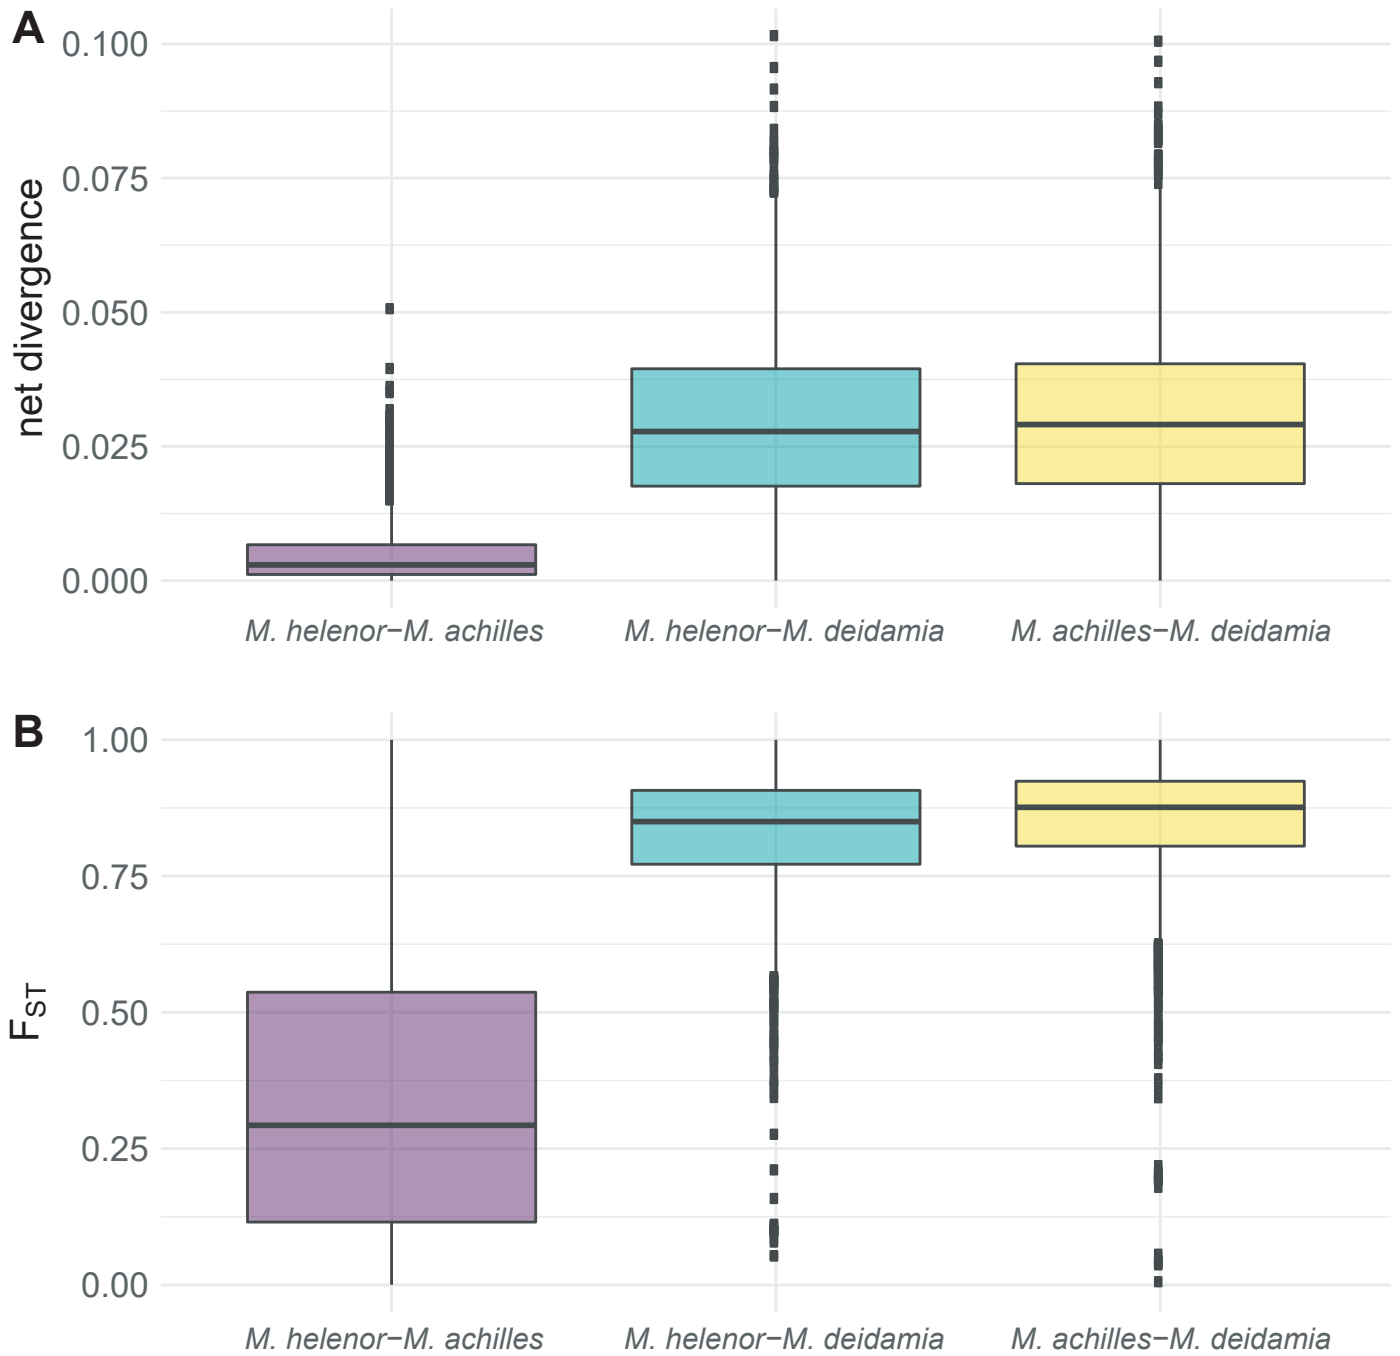

**Fig. S10. Patterns of between-species divergence and differentiation.** A) net divergence measured  $D_a$  (Nei, 1987). B)  $F_{ST}$  computed as  $(1 - \pi_S) / \pi_T$  where  $\pi_S$  is the average pairwise nucleotide diversity within population and  $\pi_T$  is the total pairwise nucleotide diversity of the pooled sample across populations.

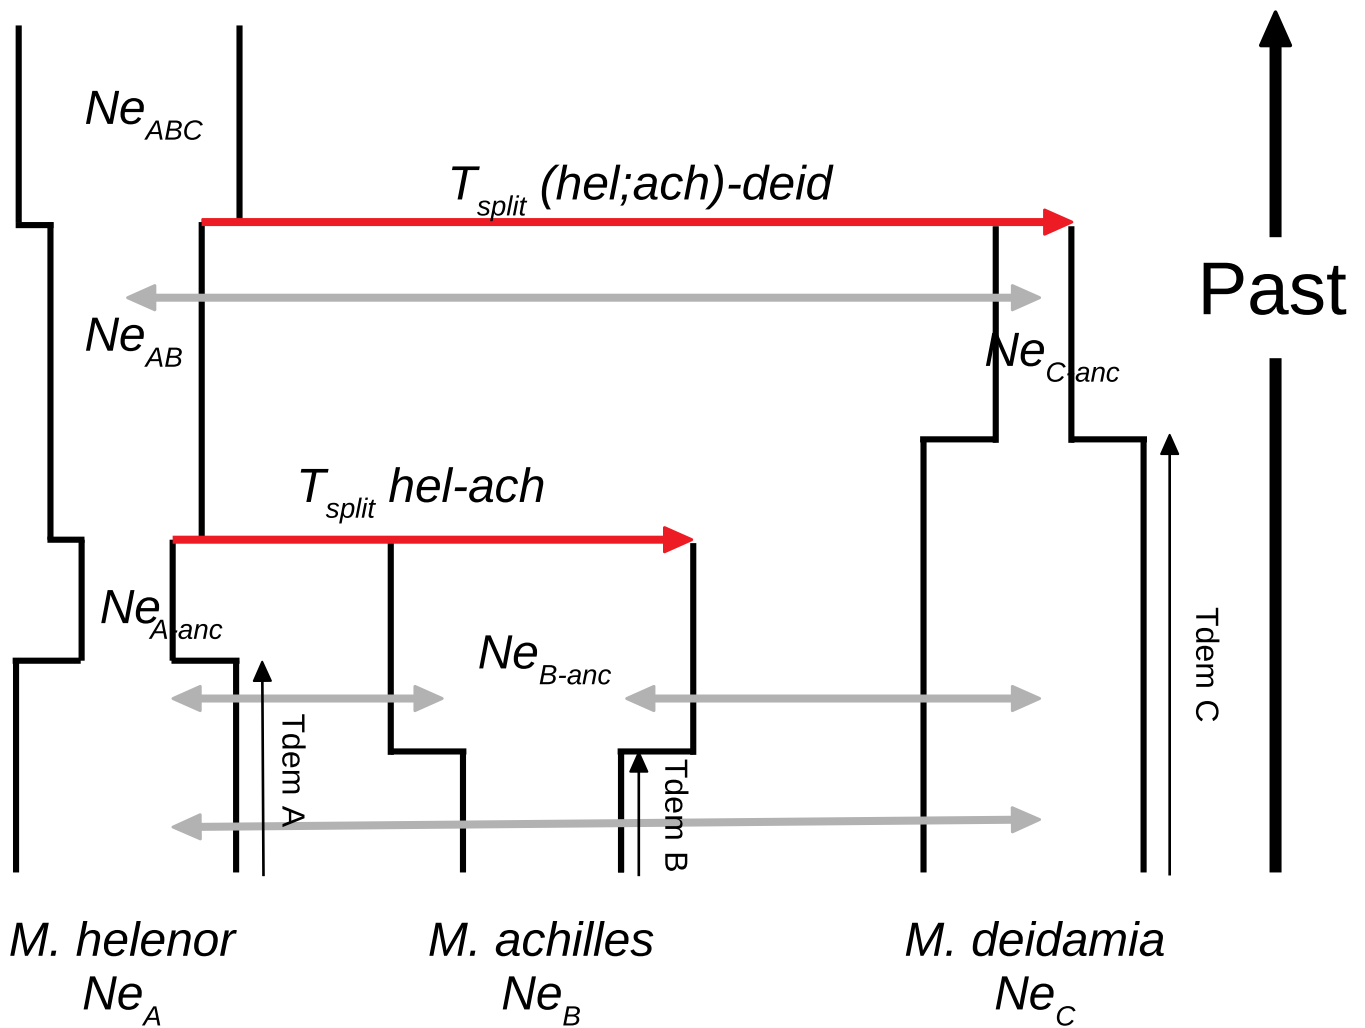

**Fig. S11. General model of 3 demes speciation with gene flow.** This model describes two successive splitting events from the ancestor (size  $Ne_{ABC}$ ) to the three sampled species (sizes  $Ne_A$ ;  $Ne_B$ ;  $Ne_C$ ). Each split event is followed by the drawing of a new population size (after the first split:  $Ne_{AB}$ ;  $Ne_{C-anc}$ . After the second split:  $Ne_{A-anc}$ ;  $Ne_{B-anc}$ ). Populations may also undergo a demographic change in size at some point in their recent history, at times  $T_{dem-A}$ ,  $T_{dem-B}$  and  $T_{dem-C}$ . This demographic change consists of the sampling of a new population size that may be larger or smaller than the size of their ancestor. Two migration relationships are considered: 1) migration between C and (A;B). 2) migration between A and B. Concerning the first migration relationship, 4 scenarios are explored: migration only between A and C; only between B and C; between A-C and B-C; no migration at all. Concerning the second migration relationship, 2 scenarios are explored: ancient migration (restricted to the first generations after a split) and secondary contact (isolation after a split then contact with gene flow). Ages of migration changes are randomly drawn between zero and the age of the split leading to the concerned lineages.

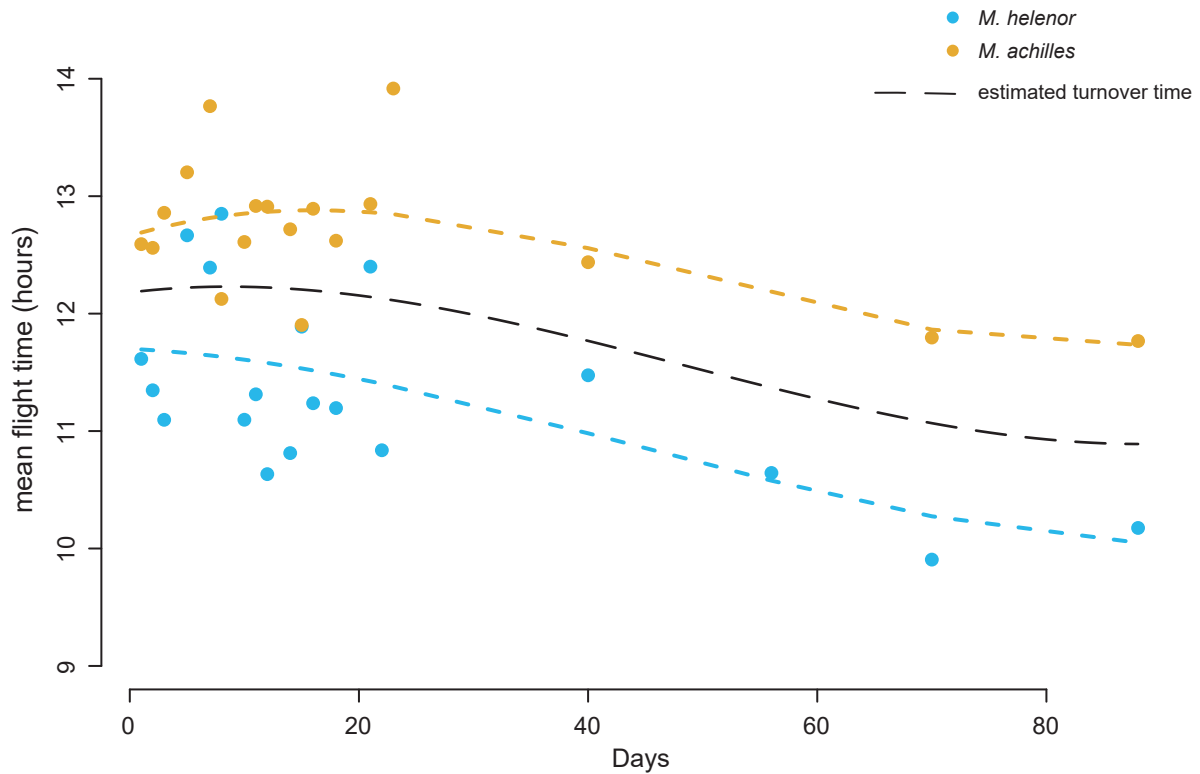

**Fig. S12.** Plot of the mean flight time of the two mimetic species *M. helenor* and *M. achilles* over a ~three-month period. Capture sessions were performed on consecutive days during the first 20 day of experiment. We then performed one day of capture every 2 weeks during 2 months in parallel to the dummy experiment to verify that temporal activity was stable over time. Because turnover time slightly change over the duration of the experiment, we estimated the identify of the flying *Morpho* during the dummy experiment based on the hours of the day and the turnover time estimated for this day.

**Table S1.** Number of captures and recaptures per *Morpho* species.

| Species            | Total number of capture | Total number of recapture | Mean % of recapture per day |
|--------------------|-------------------------|---------------------------|-----------------------------|
| <i>M. helenor</i>  | 92                      | 24                        | 23.9                        |
| <i>M. achilles</i> | 121                     | 36                        | 29.7                        |
| <i>M. deidamia</i> | 48                      | 11                        | 22.9                        |

**Table S2. Effect of dummy identity (both sex confounded) on the number of approaches and interactions.** The effect of dummy characteristics and of day of experiment on the number of approaches and interactions was tested using logistic regression models. Below are reported the results of likelihood ratio tests comparing models in order to test the global effect of each variable on the number of approaches and interactions.

**Visitor *M. helenor***

---

|             | Dummy identity |           |             | Dummy sex |           |          | Dummy wing area |           |          | Dummy blue proportion |           |          | Day of exp. |           |             |
|-------------|----------------|-----------|-------------|-----------|-----------|----------|-----------------|-----------|----------|-----------------------|-----------|----------|-------------|-----------|-------------|
|             | <i>D</i>       | <i>df</i> | <i>P</i>    | <i>D</i>  | <i>df</i> | <i>P</i> | <i>D</i>        | <i>df</i> | <i>P</i> | <i>D</i>              | <i>df</i> | <i>P</i> | <i>D</i>    | <i>df</i> | <i>P</i>    |
| Approach    | 12.6           | 4         | <b>0.01</b> | 0.8       | 1         | 0.35     | 0.20            | 1         | 0.65     | 0.72                  | 1         | 0.39     | 58.8        | 31        | <b>0.00</b> |
| Interaction | 25.6           | 4         | <b>0.00</b> | 0.6       | 1         | 0.43     | 3.3             | 1         | 0.06     | 1.0                   | 1         | 0.30     | 41.6        | 31        | 0.09        |

**Visitor *M. achilles***

---

|             | Dummy identity |           |             | Dummy sex |           |          | Dummy wing area |           |          | Dummy blue proportion |           |             | Day of exp. |           |             |
|-------------|----------------|-----------|-------------|-----------|-----------|----------|-----------------|-----------|----------|-----------------------|-----------|-------------|-------------|-----------|-------------|
|             | <i>D</i>       | <i>df</i> | <i>P</i>    | <i>D</i>  | <i>df</i> | <i>P</i> | <i>D</i>        | <i>df</i> | <i>P</i> | <i>D</i>              | <i>df</i> | <i>P</i>    | <i>D</i>    | <i>df</i> | <i>P</i>    |
| Approach    | 11.4           | 4         | <b>0.02</b> | 3.5       | 1         | 0.06     | 1.7             | 1         | 0.18     | 4.8                   | 1         | <b>0.02</b> | 73.6        | 36        | <b>0.00</b> |
| Interaction | 60.2           | 4         | <b>0.00</b> | 2.4       | 1         | 0.12     | 1.1             | 1         | 0.28     | 6.5                   | 1         | <b>0.01</b> | 66.0        | 38        | <b>0.00</b> |

**Table S3. Effect of dummy identity (sex separated) on the number of approaches and interactions.**

The effect of dummy identity on the number of approach and interaction was tested using logistic regression models. Below are reported the results of likelihood ratio tests comparing models in order to test the global effect of each variable on the number of approaches and interactions.

**Visitor *M. helenor***

|             | Male dummies   |           |             |             |           |             | Female dummies |           |             |             |           |          |
|-------------|----------------|-----------|-------------|-------------|-----------|-------------|----------------|-----------|-------------|-------------|-----------|----------|
|             | Dummy identity |           |             | Day of exp. |           |             | Dummy identity |           |             | Day of exp. |           |          |
|             | <i>D</i>       | <i>df</i> | <i>P</i>    | <i>D</i>    | <i>df</i> | <i>P</i>    | <i>D</i>       | <i>df</i> | <i>P</i>    | <i>D</i>    | <i>df</i> | <i>P</i> |
| Approach    | 4.7            | 4         | 0.31        | 38.1        | 18        | 0.31        | 7.9            | 3         | 0.50        | 19.4        | 12        | 0.07     |
| Interaction | 12.8           | 4         | <b>0.01</b> | 32.9        | 18        | <b>0.01</b> | 12.1           | 3         | <b>0.00</b> | 10.6        | 12        | 0.55     |

**Visitor *M. achilles***

|             | Male dummies   |           |             |             |           |             | Female dummies |           |             |             |           |             |
|-------------|----------------|-----------|-------------|-------------|-----------|-------------|----------------|-----------|-------------|-------------|-----------|-------------|
|             | Dummy identity |           |             | Day of exp. |           |             | Dummy identity |           |             | Day of exp. |           |             |
|             | <i>D</i>       | <i>df</i> | <i>P</i>    | <i>D</i>    | <i>df</i> | <i>P</i>    | <i>D</i>       | <i>df</i> | <i>P</i>    | <i>D</i>    | <i>df</i> | <i>P</i>    |
| Approach    | 2.7            | 4         | 0.59        | 32.1        | 20        | <b>0.04</b> | 14.9           | 3         | <b>0.00</b> | 39.9        | 14        | <b>0.00</b> |
| Interaction | 55.6           | 4         | <b>0.00</b> | 38.1        | 20        | <b>0.00</b> | 19.8           | 3         | <b>0.00</b> | 28.6        | 14        | <b>0.01</b> |

**Table S4. Effect of wing area and blue proportion of the dummies on the number of approaches and interactions.**

The effect of dummy wing area and proportion of blue colouration on the number of approaches and interactions was tested using logistic regression models. Below are reported the results of likelihood ratio tests comparing model in order to test the global effect of each variable on the number of approaches and interactions.

**Visitor (all species)**

|             | Dummy wing area |           |             | Dummy blue proportion |           |             | Day of exp. |           |             |
|-------------|-----------------|-----------|-------------|-----------------------|-----------|-------------|-------------|-----------|-------------|
|             | <i>D</i>        | <i>df</i> | <i>P</i>    | <i>D</i>              | <i>df</i> | <i>P</i>    | <i>D</i>    | <i>df</i> | <i>P</i>    |
|             | Approach        | 2.60      | 1           | 0.10                  | 0.39      | 1           | 0.52        | 132.9     | 46          |
| Interaction | 48.5            | 1         | <b>0.00</b> | 12.9                  | 1         | <b>0.00</b> | 117.1       | 46        | <b>0.00</b> |

**Visitor *M. helenor***

|             | Dummy wing area |           |             | Dummy blue proportion |           |          | Day of exp. |           |          |
|-------------|-----------------|-----------|-------------|-----------------------|-----------|----------|-------------|-----------|----------|
|             | <i>D</i>        | <i>df</i> | <i>P</i>    | <i>D</i>              | <i>df</i> | <i>P</i> | <i>D</i>    | <i>df</i> | <i>P</i> |
|             | Approach        | 1.7       | 1           | 0.18                  | 0.98      | 1        | 0.33        | 70.5      | 36       |
| Interaction | 22.1            | 1         | <b>0.00</b> | 0.12                  | 1         | 0.72     | 47.1        | 36        | 0.10     |

**Visitor *M. achilles***

|             | Dummy wing area |           |             | Dummy blue proportion |           |             | Day of exp. |           |             |
|-------------|-----------------|-----------|-------------|-----------------------|-----------|-------------|-------------|-----------|-------------|
|             | <i>D</i>        | <i>df</i> | <i>P</i>    | <i>D</i>              | <i>df</i> | <i>P</i>    | <i>D</i>    | <i>df</i> | <i>P</i>    |
|             | Approach        | 11.0      | 1           | <b>0.00</b>           | 0.0       | 1           | 0.82        | 83.1      | 40          |
| Interaction | 28.3            | 1         | <b>0.00</b> | 30.1                  | 1         | <b>0.00</b> | 83.9        | 40        | <b>0.00</b> |

**Table S5.** Parameters inferred by Random Forest for the best fitting model (Fig. 4 ; (Raynal et al., 2019)).

| Parameters                                                                            | Estimated value | Quantile 2.5 % | Quantile 97.5 % |
|---------------------------------------------------------------------------------------|-----------------|----------------|-----------------|
| <b>Effective population sizes (<math>N_e</math>) in number of diploid individuals</b> |                 |                |                 |
| <i>Ne M. helenor</i> (current)                                                        | 645,401         | 449,793        | 698,620         |
| <i>Ne M. helenor</i> (bottleneck)                                                     | 300,790         | 17,905         | 669,893         |
| <i>Ne M. achilles</i> (current)                                                       | 631,518         | 433,301        | 698,481         |
| <i>Ne M. achilles</i> (bottleneck)                                                    | 187,174         | 12,588         | 637,813         |
| <i>Ne M. deidamia</i> (current)                                                       | 496,636         | 237,820        | 690,466         |
| <i>Ne M. deidamia</i> (bottleneck)                                                    | 113,487         | 8,589          | 505,687         |
| <i>Ne M. helenor – M. achilles</i> (ancestor)                                         | 409,703         | 87,599         | 673,563         |
| Ancestral $N_e$                                                                       | 649,647         | 520,520        | 698,332         |
| Shape parameter alpha                                                                 | 4.55            | 0.81           | 9.96            |
| Shape parameter beta                                                                  | 10.20           | 0.57           | 19.59           |
| <b>Time of demographic events in number of generations</b>                            |                 |                |                 |
| <i>M. helenor</i> expansion                                                           | 677,138         | 30,165         | 1,711,892       |
| <i>M. achilles</i> expansion                                                          | 545,804         | 26,027         | 1,559,309       |
| <i>M. deidamia</i> expansion                                                          | 455,822         | 16,735         | 1,695,739       |
| Split <i>M. helenor – M. achilles</i>                                                 | 1,110,618       | 356,427        | 3,451,551       |
| Ancestral split                                                                       | 4,133,448       | 3,860,151      | 4,562,831       |
| Arrest of migration <i>M. helenor – M. achilles</i>                                   | 769,233         | 346,007        | 1,270,989       |
| <b>Migration (<math>4.N.m</math>)</b>                                                 |                 |                |                 |
| <b><i>M. achilles</i> → <i>M. helenor</i></b>                                         |                 |                |                 |
| Migration rate                                                                        | 25.27           | 2.86           | 48.93           |
| Shape parameter alpha                                                                 | 9.81            | 0.37           | 19.67           |
| Shape parameter beta                                                                  | 10.22           | 0.36           | 19.68           |
| <b><i>M. helenor</i> → <i>M. achilles</i></b>                                         |                 |                |                 |
| Migration rate                                                                        | 25.36           | 2.83           | 49.22           |
| Shape parameter alpha                                                                 | 10.37           | 0.33           | 19.62           |
| Shape parameter beta                                                                  | 9.82            | 0.37           | 19.66           |
